# Supplementary material for: Targeting Myocardial Mitochondria-STING-Polyamine Axis Prevents Cardiac Hypertrophy in Chronic Kidney Disease
Source: PubMed Central journal article supplement — JACC Basic Transl Sci. 2022 Aug 3;7(8):820–40. doi: 10.1016/j.jacbts.2022.03.006 (PMC9436763; doi:10.1016/j.jacbts.2022.03.006), 2022-08-03
Supplement: mmc1.pdf [file mmc1.pdf]

# Supplementary Data

## Targeting Myocardial Mitochondria-STING-Polyamine Axis Prevents Cardiac Hypertrophy in Chronic Kidney Disease

*Wenhao Han, MD<sup>a1</sup>; Changhong Du, PhD<sup>b1</sup>; Yingguo Zhu, MS<sup>a</sup>; Li Ran, MS<sup>a</sup>; Yue Wang, MD<sup>a</sup>; Jiachuan Xiong, MD<sup>a</sup>; Yiding Wu, PhD<sup>b</sup>; Qigang Lan, MS<sup>a</sup>; Yaqin Wang, MS<sup>a</sup>; Liting Wang, MS<sup>c</sup>; Junping Wang, PhD<sup>b</sup>; Ke Yang, PhD<sup>a\*</sup> and Jinghong Zhao, MD, PhD<sup>a\*</sup>*

**This file includes:**

**Supplementary Figures 1-6**

**Table S1-S4**

**Test of Normality**

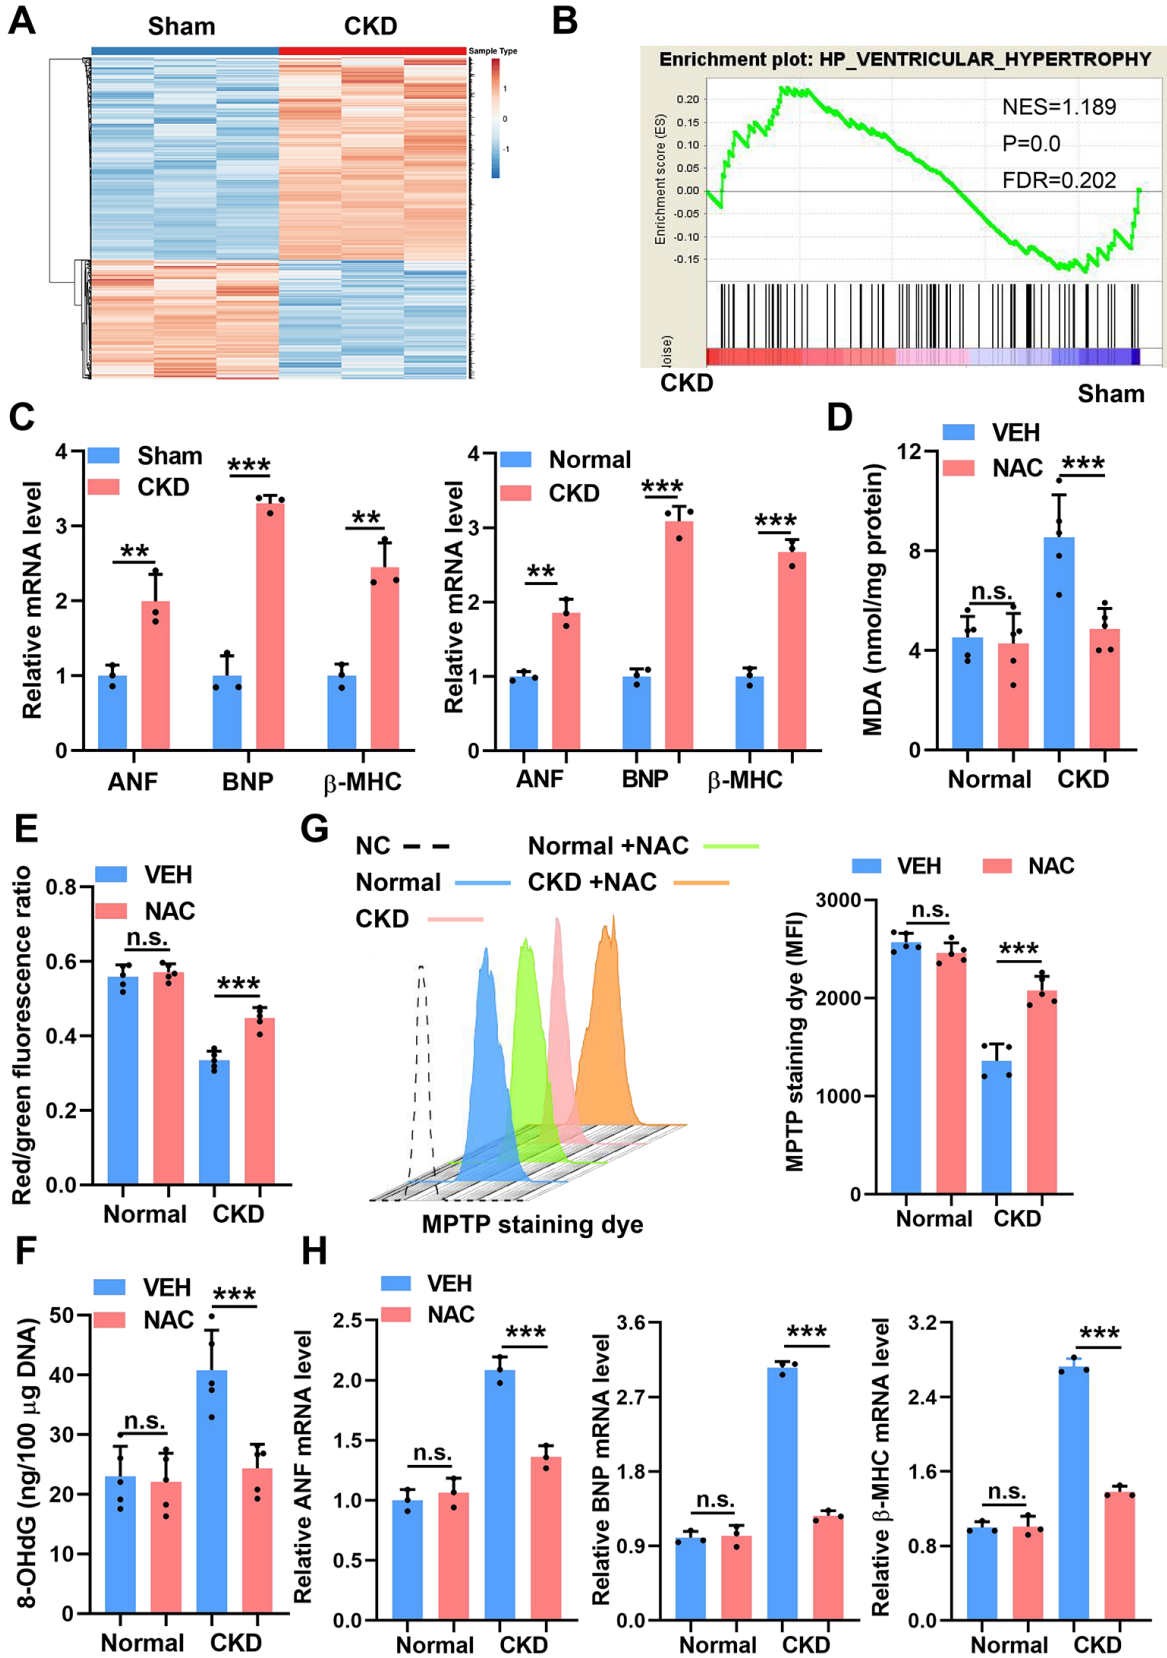

**Figure S1. CKD-induced oxidative stress results in mitochondrial oxidative damage and cardiomyocyte hypertrophy.** (A) The heat map shows greatly different gene expression profiles of myocardia from Sham and CKD mice. (B) GSEA analysis of gene sets associated with ventricular hypertrophy in the myocardia from CKD mice. (C) Relative mRNA levels of ANF, BNP and  $\beta$ -MHC in the myocardia and NRCMs. (D) The contents of MDA in NRCMs incubated with normal and CKD serums with or without NAC treatment. (E) Quantification of mitochondrial membrane potential in NRCMs incubated with normal or CKD serum with or without NAC treatment. (F) The contents of 8-OHdG in NRCMs incubated with normal and CKD serum with or without NAC treatment. (G) Representative flow cytometry plots and quantification of MPTP permeability in NRCMs incubated with normal and CKD serum with or without NAC treatment. (H) Relative mRNA levels of ANF, BNP and  $\beta$ -MHC in NRCMs incubated with normal and CKD serum with or without NAC treatment. Data are represented as mean  $\pm$  SD and were analyzed by two-tailed Student's *t*-test (C) or by one-way ANOVA (D-H). n = 3 biologically independent experiments. n.s., no significance. \*\**P* <0.01, \*\*\**P* <0.001.

**A**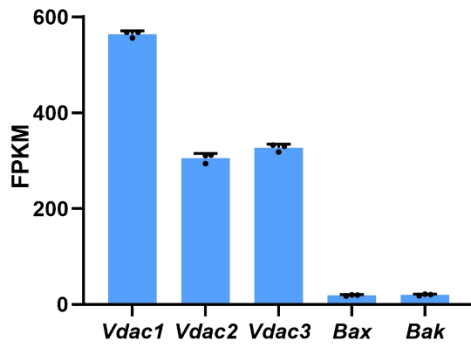**B**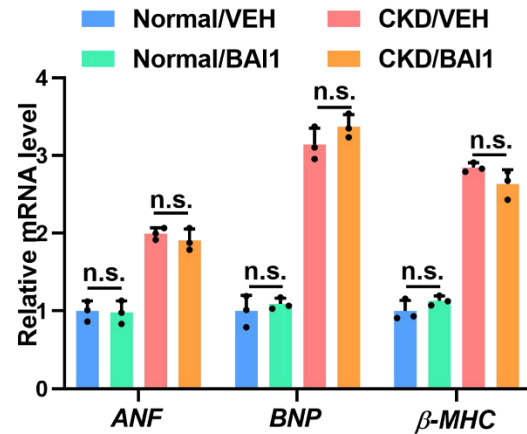**C**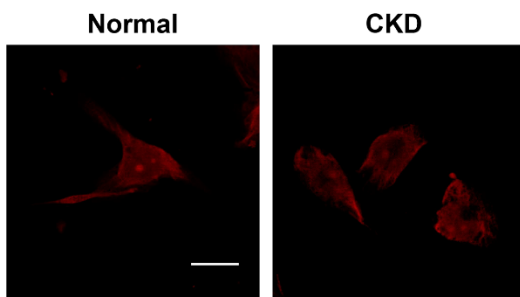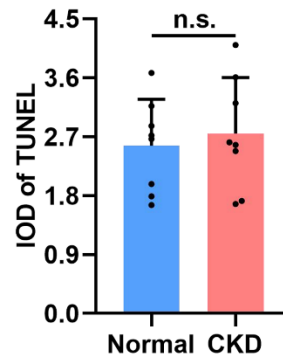

**Figure S2. BAK/BAX is not responsible for CKD-induced MOMP in cardiomyocytes.** (A) FPKMs of Vdac1, Vdac2, Vdac3, Bax and Bak in the myocardia from Sham mice. (B) Relative mRNA levels of ANF, BNP and  $\beta$ -MHC in normal and CKD serum-incubated NRCMs with or without BAI1 treatment. (C) Representative TUNEL staining in normal and CKD serum-incubated NRCMs. Scale bar, 20  $\mu$ m. Data are represented as mean  $\pm$  SD and were analyzed by one-way ANOVO (B) and two-tailed Student's t-test (C). n = 3 biologically independent experiments. n.s., no significance.

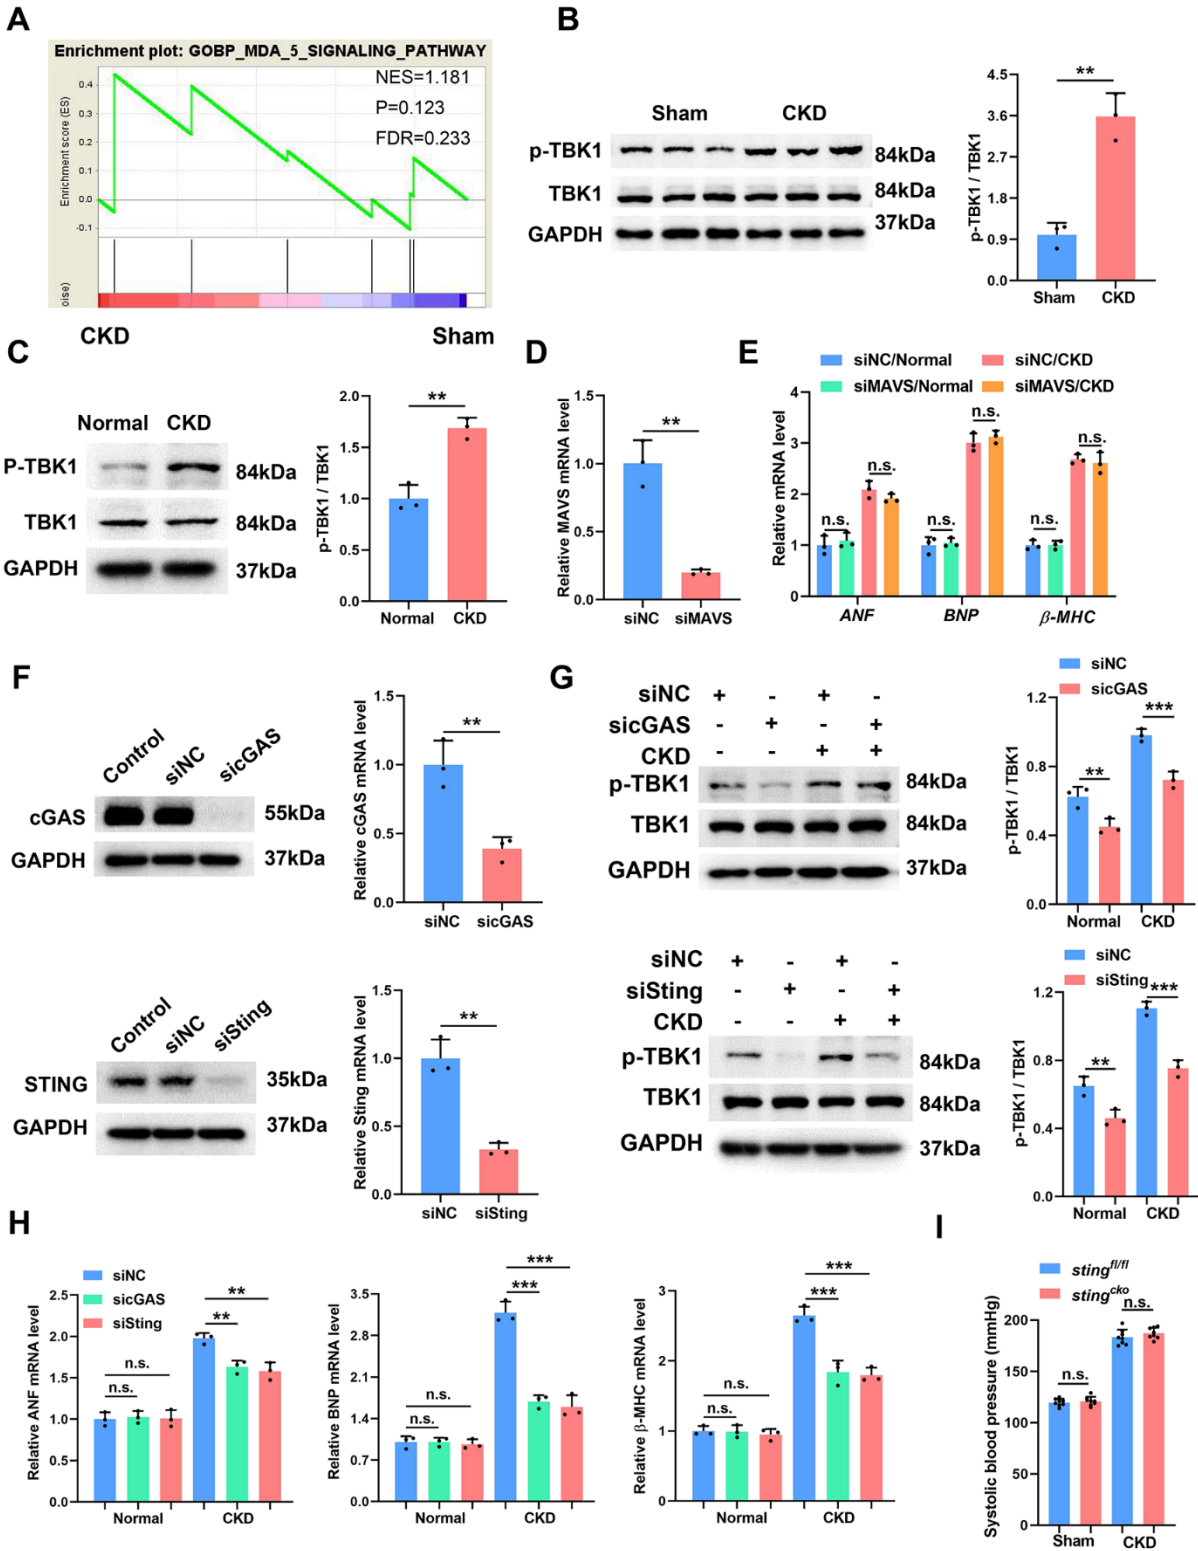

**Figure S3. cGAS-STING pathway drives CKD-induced cardiac hypertrophy.** (A) GSEA analysis of gene sets associated with MDA5 signaling pathway in the myocardia from CKD mice.

(B) Representative WB analysis of p-TBK1 in the myocardia from mice with or without CKD. (C) Representative WB analysis of p-TBK1 in NRCMs incubated with normal or CKD serum. (D) Representative mRNA expression levels of MAVS in NRCMs after RNAi. (E) Relative mRNA levels of ANF, BNP, and  $\beta$ -MHC in normal and CKD serum-incubated NRCMs with or without siMAVS treatment. (F) Representative protein and mRNA expression levels of cGAS and STING in NRCMs after RNAi. (G) Representative WB analysis of p-TBK1 in NRCMs incubated with normal or CKD serum with or without sicGAS or siSting treatment. (H) Relative mRNA levels of ANF, BNP, and  $\beta$ -MHC in normal and CKD serum-incubated NRCMs with or without sicGAS or siSting treatment. (I) Evolution of systolic blood pressure from *Sting*<sup>cko</sup> and *Sting*<sup>fl/fl</sup> mice with or without CKD. Data represent mean  $\pm$  SD and were analyzed by two-tailed Student's t-test (B-D and F) or by one-way ANOVA (E and G-I). n = 3 biologically independent experiments. n.s., no significance. \*\**P* <0.01, \*\*\**P* <0.001.

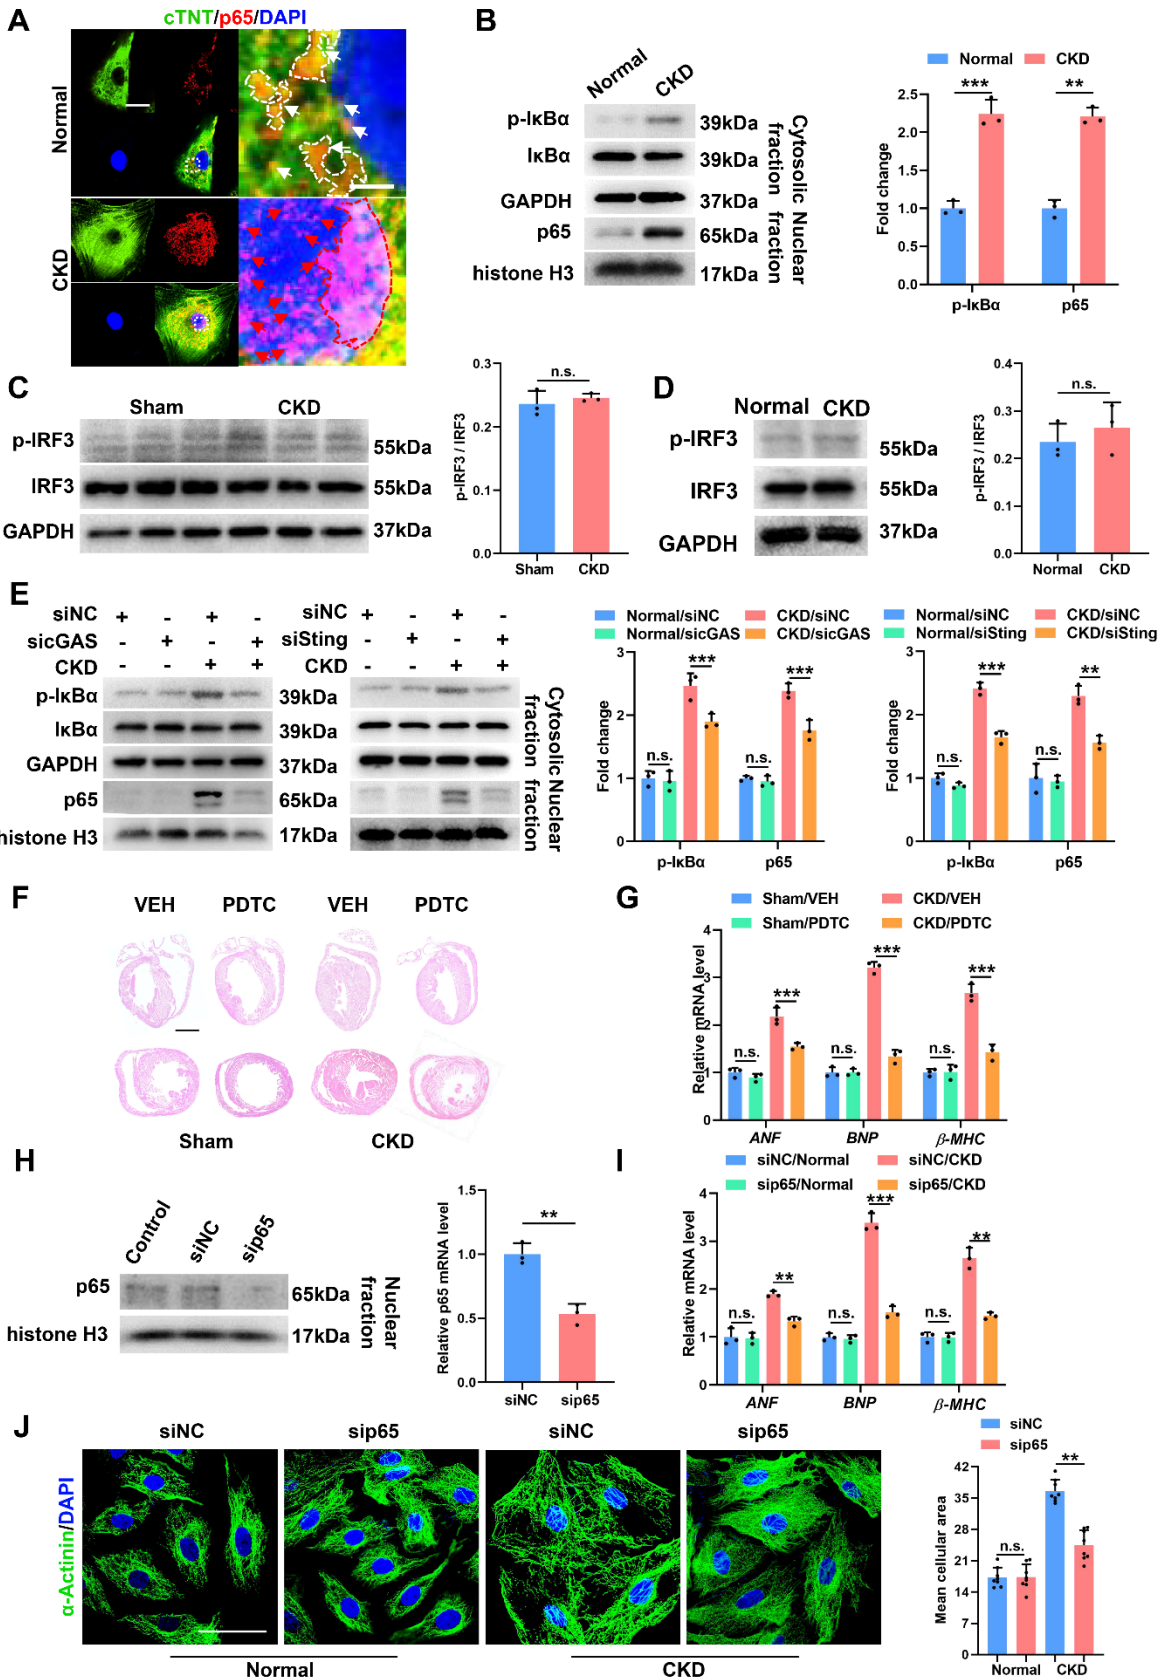

**Figure S4. NF $\kappa$ B rather than IRF3 acts downstream of cGAS-STING pathway to drive CKD-induced cardiac hypertrophy.** (A) Representative images of p65 and cTNT staining in NRCMs incubated with normal or CKD serum. The region marked by box is magnified in right panel. Cytoplasmic p65 is marked by white arrow, nuclear p65 is marked by red arrow. Scale bar, 20  $\mu$ m in left panel, 4  $\mu$ m in right panel. (B) Representative WB analysis of p-I $\kappa$ B $\alpha$  and p65 in NRCMs incubated with normal or CKD serum. (C-D) Representative WB analysis of p-IRF3 in the myocardia and NRCMs. (E) Representative WB analysis of p-I $\kappa$ B $\alpha$  and p65 in NRCMs incubated with normal and CKD serum with or without sicGAS and siSting treatment. (F) Representative HE staining of sagittal and midchamber sections of the hearts. Scale bar, 200  $\mu$ m. (G) Relative mRNA levels of ANF, BNP and  $\beta$ -MHC in the myocardia from Sham and CKD mice with or without PDTC treatment. (H) Representative protein and mRNA expression levels of p65 in NRCMs after RNAi. (I) Relative mRNA levels of ANF, BNP, and  $\beta$ -MHC in NRCMs incubated with normal and CKD serum with or without sip65 treatment. (J) Representative images of  $\alpha$ -Actinin staining in normal and CKD serum-incubated NRCMs with or without sip65 treatment. Scale bars, 20  $\mu$ m. Data represent mean  $\pm$  SD and were analyzed by two-tailed Student's t-test (B-D and H) or by one-way ANOVA (E, G, I and J). n=3 biologically independent experiments. n.s., no significance. \*\* $P$  <0.01, \*\*\* $P$  <0.001.



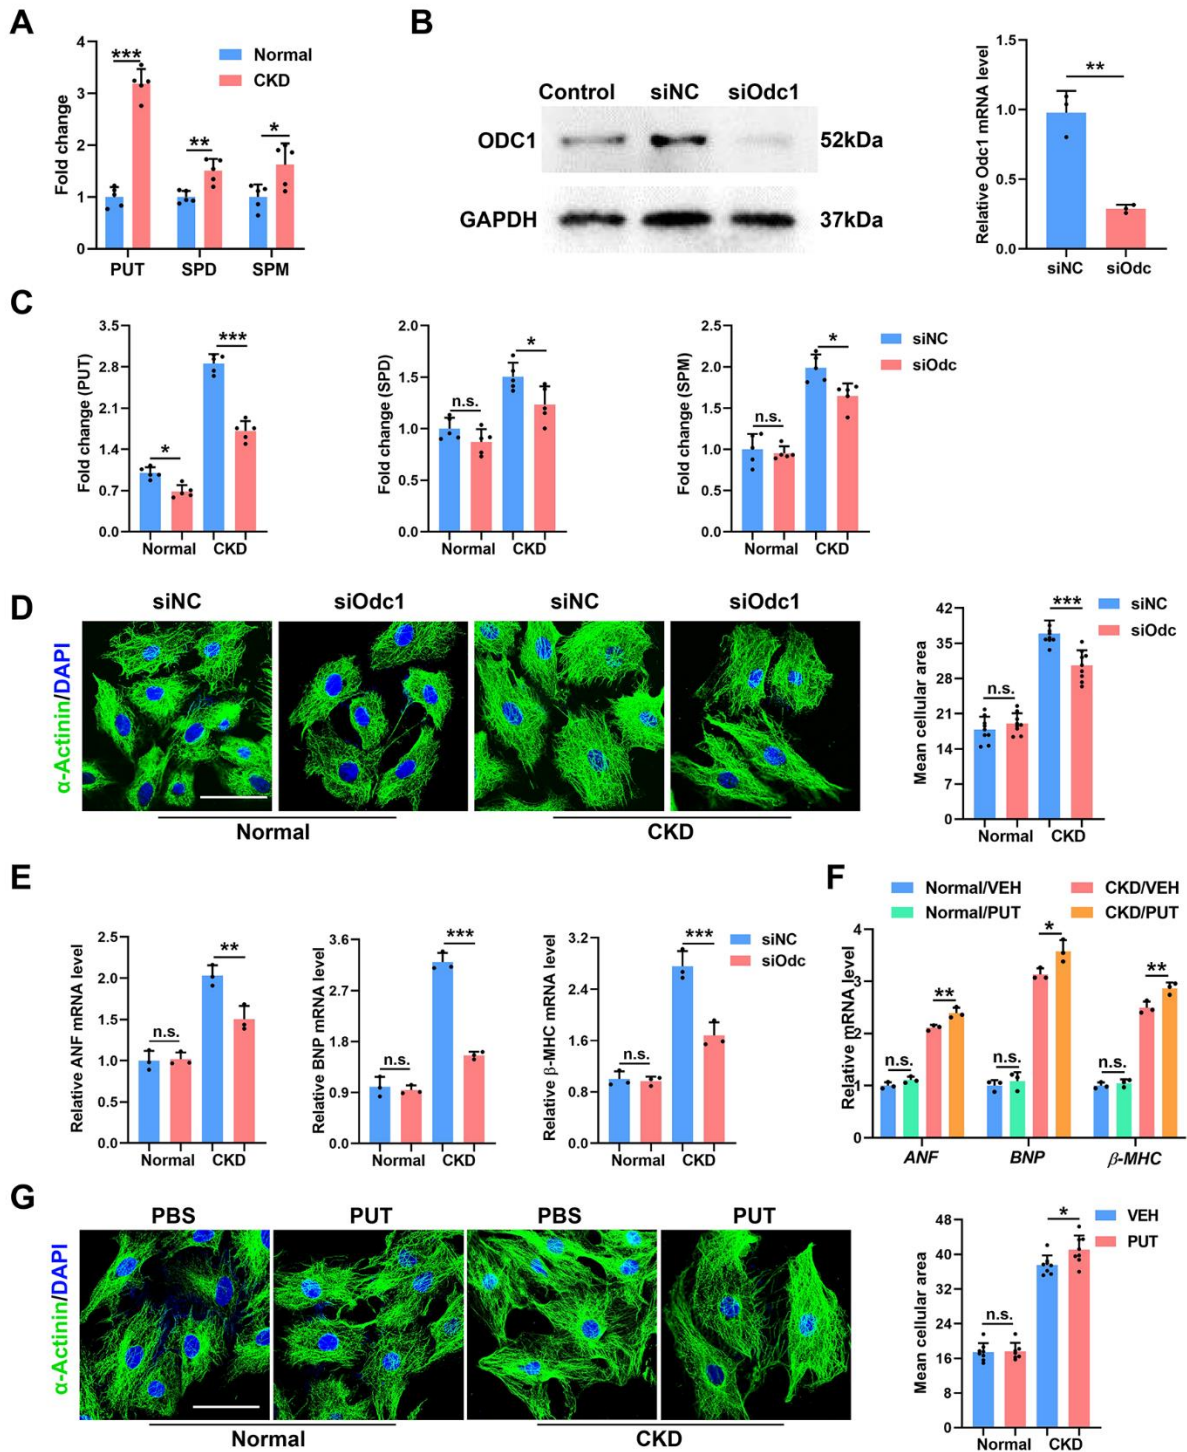

**Figure S5. Myocardial ODC1-PUT metabolic flux is implicated in CKD-induced cardiac hypertrophy.** (A) The contents of PUT, SPD, and SPM in NRCMs were detected using HPLC.

(B) Representative protein and mRNA expression levels of ODC1 in NRCMs after RNAi. (C) The contents of polyamine in normal and CKD serum-incubated NRCMs with or without siOdc1 treatment. (D) Representative images of  $\alpha$ -Actinin staining in normal and CKD serum-incubated NRCMs with or without siOdc1 treatment. Scale bars, 20  $\mu$ m. (E) Relative mRNA levels of ANF, BNP, and  $\beta$ -MHC in normal and CKD serum-incubated NRCMs with or without siOdc1 treatment. (F) Relative mRNA levels of ANF, BNP, and  $\beta$ -MHC in NRCMs incubated with normal and CKD serums with or without PUT supplementation. (G) Representative images of  $\alpha$ -Actinin staining in normal and CKD serum-incubated NRCMs with or without PUT supplementation. Scale bars, 20  $\mu$ m. Data represent mean  $\pm$  SD and were analyzed by two-tailed Student's t-test (A-B) or by one-way ANOVA (C-G). n = 3 biologically independent experiments. n.s., no significance. \* $P$  <0.05, \*\* $P$  <0.01, \*\*\* $P$  <0.001..

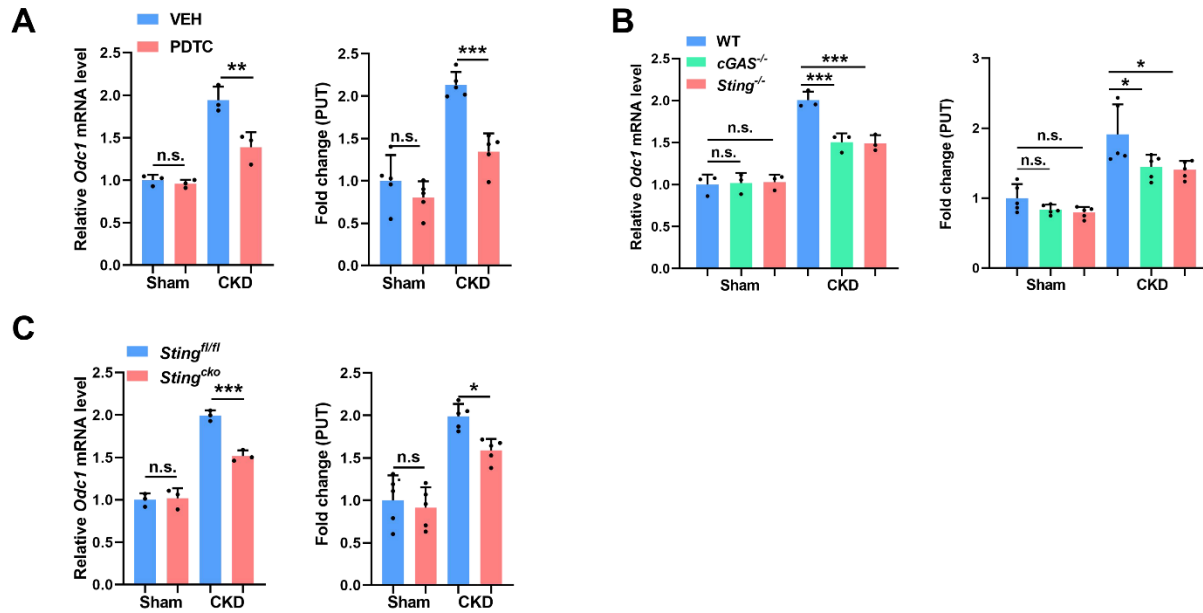

**Figure S6. ODC1 expression is positively associated with STING-NFκB pathway activity in cardiomyocytes under CKD milieu.** (A) Relative mRNA levels of *Odc1* (left) and the contents of PUT (right) in the myocardia from sham and CKD mice with or without PDTC treatment. (B) Relative mRNA levels of *Odc1* (left) and the contents of PUT (right) in the myocardia from *cGAS*<sup>-/-</sup> or *Sting*<sup>-/-</sup> mice with or without CKD. (C) Relative mRNA levels of *Odc1* (left) and the contents of PUT (right) in the myocardia from *Sting*<sup>cko</sup> or *Sting*<sup>fl/fl</sup> mice with or without CKD. Data represent mean ± SD and were analyzed by one-way ANOVA. n = 3 biologically independent experiments. n.s, no significance. \**P* < 0.05, \*\**P* < 0.01, \*\*\**P* < 0.001.

**Table S1**

**Sequences of primers for Real-Time Quantitative PCR**

| Gene           | Forward primer           | Reverse primer           |
|----------------|--------------------------|--------------------------|
|                | Rat                      |                          |
| <i>Gapdh</i>   | GATGGTGAAGGTCGGTGTGA     | CGGGATCTCGCTCCTGGAA      |
| <i>β-Actin</i> | AGATCAAGATCATTGCTCCTCCT  | ACGCAGCTCAGTAACAGTCC     |
| <i>B2m</i>     | GGACTCCAAGGCAGAACAGT     | CAGACCCCAGCCTTTACACA     |
| <i>ANF</i>     | GGGAAGTCAACCCGTCTCA      | GGGCTCCAATCCTGTCAAT      |
| <i>BNP</i>     | GACGGGCTGAGGTTGTTTTA     | ACTGTGGCAAGTTTGTGCTG     |
| <i>β-MHC</i>   | TGACAGATCGGGAGAACCAG     | CCGAAGTGTCTTGGCATTGC     |
| <i>Odc1</i>    | ATGGGCAGCTTTACTAAGGAAGAG | GTCAAGCAGATACATGCTGAAACC |
| <i>Nd1</i>     | GAACCCATACGCCCCCTAAC     | GCTCGTAGGGCTCCGAATAG     |
| <i>Nd2</i>     | TACCCGAAGTCACCCAAGGA     | AGGCGCCAACAAAGACTGAT     |
| <i>Nd4</i>     | ACGAACGAATTCACAGCCGA     | AGGGGTGGTAGTGCTAGGTT     |
| <i>Nd5</i>     | AGCAATCTGTGCTCTCACCC     | GCATGGGTGCAAATGTGGAG     |
| Mice           |                          |                          |
| <i>Gapdh</i>   | TCTCTGCTCCTCCCTGTTCC     | TACGGCCAAATCCGTTCAACA    |
| <i>ANF</i>     | GTGCGGTGTCCAACACAGAT     | TCCAATCCTGTCAATCCTACCC   |
| <i>BNP</i>     | GAGGTCACCTCCTATCCTCTGG   | GCCATTTCTCCGACTTTTCTC    |
| <i>β-MHC</i>   | AGACTGTCAACACTAAGAGGGT   | TGCCCCAAAATGGATTCGGAT    |
| <i>Odc1</i>    | GCCTTGATCGGATCGTGGAG     | ATAGCTTCTGGCTCCTGGTTG    |

**Table S2****Sequences of siRNA**

| <b>Name</b>    | <b>Forward primer</b>        | <b>Reverse primer</b>        |
|----------------|------------------------------|------------------------------|
|                | <b>Rat</b>                   |                              |
| <i>siGAS</i>   | <b>GAAUCGAGCUAGAAGAAUATT</b> | <b>UAUUCUUCUAGCUCGAUUCTT</b> |
| <i>siSting</i> | <b>GCACAUUCGGCAAGAAGAATT</b> | <b>UUCUUCUUGCCGAAUGUGCTT</b> |
| <i>siOdc1</i>  | <b>GAGAGGAUUAUCUAUGCAATT</b> | <b>UUGCAUAGAUAAUCCUCUCTT</b> |
| <i>siip65</i>  | <b>GACUGUUGUCAUUCUGGAATT</b> | <b>UCCAGAAUGACAACAGUCTT</b>  |
| <i>siMAVS</i>  | <b>GUCCAGAGGAGAAUGAGUATT</b> | <b>UACUCAUUCUCCUCUGGACTT</b> |

Table S3

Sequences of ChIP

| Name       | Forward primer                 | Reverse primer             |
|------------|--------------------------------|----------------------------|
|            | <b>Rat</b>                     |                            |
| <i>p65</i> | AATCACTCGTTCTTTCATTCACCTCATTCA | AAGCCAAACAAACAAACAAACAAACC |
|            | ACTATGTTGCCTTGGTTGGTCTG        | ATCCACCTGCCTCTGTCTCG       |
|            | GTGGATTTCCTCTAGGGACCTCTG       | CGGGAGTGGTTGGATTAAAGGTATG  |
|            | CTGCCGCAGGGAGTGTC              | ACGCACCAGCTCAAACCAG        |
|            | GTGGTGTGGTGC GCGTG             | CGCACCAGCTCAAACCAG         |
|            | GACTGGTGGTGTGGTGC              | GACGCACCAGCTCAAACC         |
|            | <b>Mouse</b>                   |                            |
|            | GCTTTCAGGCTTAGGCATACAGG        | ATTCTTCCTCGGCTTTCATTCAG    |
|            | CCATCCATCCTCCGCTTGC            | GCGGGAGTCGGCTGGTG          |
|            | GATACGCCTGCCCCGCTAG            | CGCACCACATCACCAGTCC        |
|            | TG TAGCCGTGGTTGGTCTGG          | CTGCCTCTGCCTCAAGAATGC      |
|            | TATGTAGCCGTGGTTGGTCTGG         | TGGA ACTCTACCTGCCTCTGC     |
|            | ACTATGTAGCCGTGGTTGGTCTG        | CTCTACCTGCCTCTGCCTCAAG     |

Table S4

| Antibody                                                                     | Origin                    | Catalog number | Assay        |
|------------------------------------------------------------------------------|---------------------------|----------------|--------------|
| anti- $\alpha$ -Actinin                                                      | Cell Signaling Technology | Cat#69758s     | IF           |
| anti-GAPDH                                                                   | Cell Signaling Technology | Cat#5174s      | WB           |
| anti-p-I $\kappa$ B $\alpha$                                                 | Cell Signaling Technology | Cat#9246s      | WB           |
| anti-I $\kappa$ B $\alpha$                                                   | Cell Signaling Technology | Cat#9242s      | WB           |
| anti-p65                                                                     | Cell Signaling Technology | Cat#8242s      | WB, IF, Chip |
| anti-histone H3                                                              | Cell Signaling Technology | Cat#4499s      | WB           |
| anti-ODC1                                                                    | Santa Cruz Biotechnology  | Cat#sc-390366  | WB           |
| anti-cGAS                                                                    | Santa Cruz Biotechnology  | Cat#sc-515777  | WB, IF       |
| anti-Sting                                                                   | Cell Signaling Technology | Cat#13647s     | WB           |
| anti-DNA                                                                     | Millipore                 | Cat#CBL186     | IF           |
| anti-8-OH-dG                                                                 | Abcam                     | Cat#ab48508    | IF           |
| anti-cTNT                                                                    | Bioss                     | Cat#bs-10648r  | IF           |
| Anti-TBK1                                                                    | Cell Signaling Technology | Cat#38066s     | WB           |
| Anti-p-TBK1                                                                  | Cell Signaling Technology | Cat#5483s      | WB           |
| FLAG M2                                                                      | Sigma-Aldrich             | Cat#F1804      | Chip         |
| HRP labeled goat anti-Rabbit IgG(H+L)                                        | Abcam                     | Cat# 205718    | WB           |
| HRP labeled goat anti-Mouse IgG(H+L)                                         | Abcam                     | Cat# 205719    | WB           |
| Goat anti-Mouse IgG (H+L) Cross-Adsorbed Secondary antibody, Alexa Fluor 488 | Thermo Fisher Scientific  | Cat# A-11001   | IF           |

|                                                                                              |                                 |                     |           |
|----------------------------------------------------------------------------------------------|---------------------------------|---------------------|-----------|
| <b>Goat anti-Mouse IgG (H+L)<br/>Cross-Adsorbed Secondary<br/>antibody, Alexa Fluor 546</b>  | <b>Thermo Fisher Scientific</b> | <b>Cat# A-11003</b> | <b>IF</b> |
| <b>Goat anti-Rabbit IgG (H+L)<br/>Cross-Adsorbed Secondary<br/>antibody, Alexa Fluor 488</b> | <b>Thermo Fisher Scientific</b> | <b>Cat# A-11008</b> | <b>IF</b> |
| <b>Goat anti-Rabbit IgG (H+L)<br/>Cross-Adsorbed Secondary<br/>antibody, Alexa Fluor 546</b> | <b>Thermo Fisher Scientific</b> | <b>Cat# A-11010</b> | <b>IF</b> |



**1C****Test of Normality**

|                         |      |       |   |       | Shapiro-Wilks test |    |       |
|-------------------------|------|-------|---|-------|--------------------|----|-------|
| Kolmogorov-Smirnov test |      |       |   |       |                    | df | SIG   |
| VAR00002                | 1.00 | 0.204 | 5 | .200* | 0.913              | 5  | 0.488 |
|                         | 2.00 | 0.216 | 5 | .200* | 0.942              | 5  | 0.683 |

**Test of Normality**

|                         |      |       |   |       | Shapiro-Wilks test |    |       |
|-------------------------|------|-------|---|-------|--------------------|----|-------|
| Kolmogorov-Smirnov test |      |       |   |       |                    | df | SIG   |
| VAR00002                | 1.00 | 0.237 | 5 | .200* | 0.898              | 5  | 0.400 |
|                         | 2.00 | 0.240 | 5 | .200* | 0.944              | 5  | 0.694 |

**1E****Test of Normality**

|                         |      |       |   |       | Shapiro-Wilks test |    |       |
|-------------------------|------|-------|---|-------|--------------------|----|-------|
| Kolmogorov-Smirnov test |      |       |   |       |                    | df | SIG   |
| VAR00002                | 1.00 | 0.200 | 5 | .200* | 0.966              | 5  | 0.849 |
|                         | 2.00 | 0.300 | 5 | 0.162 | 0.852              | 5  | 0.200 |

**1G****Test of Normality**

|                         |      |       |   |       | Shapiro-Wilks test |    |       |
|-------------------------|------|-------|---|-------|--------------------|----|-------|
| Kolmogorov-Smirnov test |      |       |   |       |                    | df | SIG   |
| VAR00002                | 1.00 | 0.200 | 8 | .200* | 0.939              | 8  | 0.604 |
|                         | 2.00 | 0.209 | 8 | .200* | 0.902              | 8  | 0.299 |

**1H****Test of Normality**

|                         |      |       |   |       | Shapiro-Wilks test |    |       |
|-------------------------|------|-------|---|-------|--------------------|----|-------|
| Kolmogorov-Smirnov test |      |       |   |       |                    | df | SIG   |
| VAR00002                | 1.00 | 0.292 | 5 | 0.188 | 0.889              | 5  | 0.351 |
|                         | 2.00 | 0.153 | 5 | .200* | 0.972              | 5  | 0.890 |

**Test of Normality**

|                         |      |       |   |       | Shapiro-Wilks test |    |       |
|-------------------------|------|-------|---|-------|--------------------|----|-------|
| Kolmogorov-Smirnov test |      |       |   |       |                    | df | SIG   |
| VAR00002                | 1.00 | 0.203 | 5 | .200* | 0.942              | 5  | 0.682 |

|  |      |       |   |       |       |   |       |
|--|------|-------|---|-------|-------|---|-------|
|  | 2.00 | 0.155 | 5 | .200* | 0.987 | 5 | 0.968 |
|--|------|-------|---|-------|-------|---|-------|

**1I**

**Test of Normality**

| Kolmogorov-Smirnov test |      |       |   |       | Shapiro-Wilks test | df | SIG   |
|-------------------------|------|-------|---|-------|--------------------|----|-------|
| VAR00002                | 1.00 | 0.231 | 5 | .200* | 0.870              | 5  | 0.268 |
|                         | 2.00 | 0.211 | 5 | .200* | 0.934              | 5  | 0.623 |

**Test of Normality**

| Kolmogorov-Smirnov test |      |       |   |       | Shapiro-Wilks test | df | SIG   |
|-------------------------|------|-------|---|-------|--------------------|----|-------|
| VAR00002                | 1.00 | 0.247 | 5 | .200* | 0.906              | 5  | 0.445 |
|                         | 2.00 | 0.155 | 5 | .200* | 0.982              | 5  | 0.943 |

**2A**

**Test of Normality**

| Kolmogorov-Smirnov test |      |       |   |       | Shapiro-Wilks test | df | SIG   |
|-------------------------|------|-------|---|-------|--------------------|----|-------|
| VAR00002                | 1.00 | 0.202 | 5 | .200* | 0.975              | 5  | 0.908 |
|                         | 2.00 | 0.209 | 5 | .200* | 0.923              | 5  | 0.552 |

**2B**

**Test of Normality**

| Kolmogorov-Smirnov test |      |       |   |       | Shapiro-Wilks test | df | SIG   |
|-------------------------|------|-------|---|-------|--------------------|----|-------|
| VAR00002                | 1.00 | 0.187 | 5 | .200* | 0.961              | 5  | 0.813 |
|                         | 2.00 | 0.216 | 5 | .200* | 0.966              | 5  | 0.851 |

**2C**

**Test of Normality**

| Kolmogorov-Smirnov test |      |       |   |       | Shapiro-Wilks test | df | SIG   |
|-------------------------|------|-------|---|-------|--------------------|----|-------|
| VAR00002                | 1.00 | 0.194 | 5 | .200* | 0.947              | 5  | 0.715 |
|                         | 2.00 | 0.261 | 5 | .200* | 0.908              | 5  | 0.458 |

**Test of Normality**

| Kolmogorov-Smirnov test |      |       |   |       | Shapiro-Wilks test | df | SIG   |
|-------------------------|------|-------|---|-------|--------------------|----|-------|
| VAR00002                | 1.00 | 0.235 | 5 | .200* | 0.915              | 5  | 0.500 |
|                         | 2.00 | 0.263 | 5 | .200* | 0.904              | 5  | 0.433 |

**Test of Normality**

|                         |      |       |   |       | Shapiro-Wilks test |    |       |
|-------------------------|------|-------|---|-------|--------------------|----|-------|
|                         |      |       |   |       |                    | df | SIG   |
| Kolmogorov-Smirnov test |      |       |   |       |                    |    |       |
| VAR00002                | 1.00 | 0.303 | 5 | 0.151 | 0.902              | 5  | 0.419 |
|                         | 2.00 | 0.253 | 5 | .200* | 0.925              | 5  | 0.562 |

**2D**

**Test of Normality**

|                         |      |       |   |       | Shapiro-Wilks test |    |       |
|-------------------------|------|-------|---|-------|--------------------|----|-------|
|                         |      |       |   |       |                    | df | SIG   |
| Kolmogorov-Smirnov test |      |       |   |       |                    |    |       |
| VAR00002                | 1.00 | 0.224 | 8 | .200* | 0.860              | 8  | 0.120 |
|                         | 2.00 | 0.211 | 8 | .200* | 0.912              | 8  | 0.368 |
|                         | 3.00 | 0.197 | 8 | .200* | 0.902              | 8  | 0.302 |
|                         | 4.00 | 0.193 | 8 | .200* | 0.889              | 8  | 0.231 |

**2E**

**Test of Normality**

|                         |      |       |   |  | Shapiro-Wilks test |    |       |
|-------------------------|------|-------|---|--|--------------------|----|-------|
|                         |      |       |   |  |                    | df | SIG   |
| Kolmogorov-Smirnov test |      |       |   |  |                    |    |       |
| VAR00002                | 1.00 | 0.275 | 3 |  | 0.943              | 3  | 0.542 |
|                         | 2.00 | 0.223 | 3 |  | 0.985              | 3  | 0.766 |
|                         | 3.00 | 0.327 | 3 |  | 0.871              | 3  | 0.298 |
|                         | 4.00 | 0.311 | 3 |  | 0.897              | 3  | 0.375 |

**Test of Normality**

|                         |      |       |   |  | Shapiro-Wilks test |    |       |
|-------------------------|------|-------|---|--|--------------------|----|-------|
|                         |      |       |   |  |                    | df | SIG   |
| Kolmogorov-Smirnov test |      |       |   |  |                    |    |       |
| VAR00002                | 1.00 | 0.176 | 3 |  | 1.000              | 3  | 0.976 |
|                         | 2.00 | 0.369 | 3 |  | 0.789              | 3  | 0.089 |
|                         | 3.00 | 0.247 | 3 |  | 0.969              | 3  | 0.661 |
|                         | 4.00 | 0.354 | 3 |  | 0.820              | 3  | 0.164 |

**Test of Normality**

|                         |      |       |   |  | Shapiro-Wilks test |    |       |
|-------------------------|------|-------|---|--|--------------------|----|-------|
|                         |      |       |   |  |                    | df | SIG   |
| Kolmogorov-Smirnov test |      |       |   |  |                    |    |       |
| VAR00002                | 1.00 | 0.326 | 3 |  | 0.874              | 3  | 0.306 |
|                         | 2.00 | 0.301 | 3 |  | 0.912              | 3  | 0.425 |
|                         | 3.00 | 0.196 | 3 |  | 0.996              | 3  | 0.879 |
|                         | 4.00 | 0.290 | 3 |  | 0.926              | 3  | 0.474 |

**2G****Test of Normality**

|                         |      |       |   |       | Shapiro-Wilks test |    |       |
|-------------------------|------|-------|---|-------|--------------------|----|-------|
| Kolmogorov-Smirnov test |      |       |   |       |                    | df | SIG   |
| VAR00002                | 1.00 | 0.156 | 8 | .200* | 0.985              | 8  | 0.983 |
|                         | 2.00 | 0.160 | 8 | .200* | 0.973              | 8  | 0.919 |
|                         | 3.00 | 0.166 | 8 | .200* | 0.946              | 8  | 0.667 |
|                         | 4.00 | 0.236 | 8 | .200* | 0.922              | 8  | 0.446 |

**Test of Normality**

|                         |      |       |   |       | Shapiro-Wilks test |    |       |
|-------------------------|------|-------|---|-------|--------------------|----|-------|
| Kolmogorov-Smirnov test |      |       |   |       |                    | df | SIG   |
| VAR00002                | 1.00 | 0.143 | 8 | .200* | 0.957              | 8  | 0.778 |
|                         | 2.00 | 0.229 | 8 | .200* | 0.830              | 8  | 0.059 |
|                         | 3.00 | 0.302 | 8 | 0.031 | 0.850              | 8  | 0.095 |
|                         | 4.00 | 0.237 | 8 | .200* | 0.885              | 8  | 0.212 |

**2H****Test of Normality**

|                         |      |       |   |       | Shapiro-Wilks test |    |       |
|-------------------------|------|-------|---|-------|--------------------|----|-------|
| Kolmogorov-Smirnov test |      |       |   |       |                    | df | SIG   |
| VAR00002                | 1.00 | 0.144 | 8 | .200* | 0.955              | 8  | 0.759 |
|                         | 2.00 | 0.161 | 8 | .200* | 0.971              | 8  | 0.906 |
|                         | 3.00 | 0.166 | 8 | .200* | 0.907              | 8  | 0.330 |
|                         | 4.00 | 0.136 | 8 | .200* | 0.980              | 8  | 0.965 |

**2I****Test of Normality**

|                         |      |       |   |       | Shapiro-Wilks test |    |       |
|-------------------------|------|-------|---|-------|--------------------|----|-------|
| Kolmogorov-Smirnov test |      |       |   |       |                    | df | SIG   |
| VAR00002                | 1.00 | 0.191 | 8 | .200* | 0.928              | 8  | 0.494 |
|                         | 2.00 | 0.212 | 8 | .200* | 0.954              | 8  | 0.752 |
|                         | 3.00 | 0.186 | 8 | .200* | 0.931              | 8  | 0.521 |
|                         | 4.00 | 0.177 | 8 | .200* | 0.930              | 8  | 0.514 |

**Test of Normality**

|                         |      |       |   |       | Shapiro-Wilks test |    |       |
|-------------------------|------|-------|---|-------|--------------------|----|-------|
| Kolmogorov-Smirnov test |      |       |   |       |                    | df | SIG   |
| VAR00002                | 1.00 | 0.130 | 8 | .200* | 0.964              | 8  | 0.851 |
|                         | 2.00 | 0.149 | 8 | .200* | 0.977              | 8  | 0.945 |
|                         | 3.00 | 0.189 | 8 | .200* | 0.948              | 8  | 0.688 |
|                         | 4.00 | 0.151 | 8 | .200* | 0.974              | 8  | 0.924 |

2K

**Test of Normality**

|                         |      |       |   |  | Shapiro-<br>Wilks test |    |       |
|-------------------------|------|-------|---|--|------------------------|----|-------|
| Kolmogorov-Smirnov test |      |       |   |  |                        | df | SIG   |
| VAR00002                | 1.00 | 0.208 | 3 |  | 0.992                  | 3  | 0.827 |
|                         | 2.00 | 0.176 | 3 |  | 1.000                  | 3  | 0.981 |
|                         | 3.00 | 0.274 | 3 |  | 0.945                  | 3  | 0.547 |
|                         | 4.00 | 0.320 | 3 |  | 0.884                  | 3  | 0.335 |

**Test of Normality**

|                         |      |       |   |  | Shapiro-<br>Wilks test |    |       |
|-------------------------|------|-------|---|--|------------------------|----|-------|
| Kolmogorov-Smirnov test |      |       |   |  |                        | df | SIG   |
| VAR00002                | 1.00 | 0.275 | 3 |  | 0.943                  | 3  | 0.540 |
|                         | 2.00 | 0.331 | 3 |  | 0.866                  | 3  | 0.284 |
|                         | 3.00 | 0.340 | 3 |  | 0.849                  | 3  | 0.237 |
|                         | 4.00 | 0.186 | 3 |  | 0.998                  | 3  | 0.921 |

**Test of Normality**

|                         |      |       |   |  | Shapiro-<br>Wilks test |    |       |
|-------------------------|------|-------|---|--|------------------------|----|-------|
| Kolmogorov-Smirnov test |      |       |   |  |                        | df | SIG   |
| VAR00002                | 1.00 | 0.327 | 3 |  | 0.872                  | 3  | 0.301 |
|                         | 2.00 | 0.223 | 3 |  | 0.985                  | 3  | 0.764 |
|                         | 3.00 | 0.261 | 3 |  | 0.957                  | 3  | 0.603 |
|                         | 4.00 | 0.261 | 3 |  | 0.957                  | 3  | 0.603 |

4B

**Test of Normality**

|                         |      |       |   |       | Shapiro-<br>Wilks test |    |       |
|-------------------------|------|-------|---|-------|------------------------|----|-------|
| Kolmogorov-Smirnov test |      |       |   |       |                        | df | SIG   |
| VAR00002                | 1.00 | 0.163 | 8 | .200* | 0.947                  | 8  | 0.679 |
|                         | 2.00 | 0.212 | 5 | .200* | 0.974                  | 5  | 0.898 |
|                         | 3.00 | 0.310 | 5 | 0.130 | 0.893                  | 5  | 0.374 |
|                         | 4.00 | 0.161 | 8 | .200* | 0.941                  | 8  | 0.623 |
|                         | 5.00 | 0.209 | 5 | .200* | 0.944                  | 5  | 0.692 |
|                         | 6.00 | 0.192 | 5 | .200* | 0.970                  | 5  | 0.874 |

**Test of Normality**

|                         |      |       |   |       | Shapiro-<br>Wilks test |    |       |
|-------------------------|------|-------|---|-------|------------------------|----|-------|
| Kolmogorov-Smirnov test |      |       |   |       |                        | df | SIG   |
| VAR00002                | 1.00 | 0.131 | 8 | .200* | 0.974                  | 8  | 0.931 |
|                         | 2.00 | 0.215 | 5 | .200* | 0.962                  | 5  | 0.824 |
|                         | 3.00 | 0.189 | 5 | .200* | 0.975                  | 5  | 0.909 |
|                         | 4.00 | 0.178 | 8 | .200* | 0.956                  | 8  | 0.770 |

|      |       |   |       |       |   |       |
|------|-------|---|-------|-------|---|-------|
| 5.00 | 0.318 | 5 | 0.108 | 0.903 | 5 | 0.425 |
| 6.00 | 0.197 | 5 | .200* | 0.976 | 5 | 0.913 |

4C

**Test of Normality**

|          | Kolmogorov-Smirnov test |       |   |       | Shapiro-Wilks test | df | SIG   |
|----------|-------------------------|-------|---|-------|--------------------|----|-------|
|          |                         |       |   |       |                    |    |       |
| VAR00002 | 1.00                    | 0.164 | 8 | .200* | 0.986              | 8  | 0.986 |
|          | 2.00                    | 0.176 | 5 | .200* | 0.982              | 5  | 0.947 |
|          | 3.00                    | 0.202 | 5 | .200* | 0.937              | 5  | 0.648 |
|          | 4.00                    | 0.164 | 8 | .200* | 0.952              | 8  | 0.732 |
|          | 5.00                    | 0.269 | 5 | .200* | 0.900              | 5  | 0.412 |
|          | 6.00                    | 0.232 | 5 | .200* | 0.922              | 5  | 0.545 |

4D

**Test of Normality**

|          | Kolmogorov-Smirnov test |       |   |       | Shapiro-Wilks test | df | SIG   |
|----------|-------------------------|-------|---|-------|--------------------|----|-------|
|          |                         |       |   |       |                    |    |       |
| VAR00002 | 1.00                    | 0.256 | 8 | 0.131 | 0.861              | 8  | 0.123 |
|          | 2.00                    | 0.245 | 5 | .200* | 0.882              | 5  | 0.320 |
|          | 3.00                    | 0.266 | 5 | .200* | 0.845              | 5  | 0.179 |
|          | 4.00                    | 0.165 | 8 | .200* | 0.971              | 8  | 0.903 |
|          | 5.00                    | 0.188 | 5 | .200* | 0.962              | 5  | 0.822 |
|          | 6.00                    | 0.235 | 5 | .200* | 0.931              | 5  | 0.604 |

**Test of Normality**

|          | Kolmogorov-Smirnov test |       |   |       | Shapiro-Wilks test | df | SIG   |
|----------|-------------------------|-------|---|-------|--------------------|----|-------|
|          |                         |       |   |       |                    |    |       |
| VAR00002 | 1.00                    | 0.158 | 8 | .200* | 0.946              | 8  | 0.674 |
|          | 2.00                    | 0.220 | 5 | .200* | 0.926              | 5  | 0.567 |
|          | 3.00                    | 0.227 | 5 | .200* | 0.874              | 5  | 0.283 |
|          | 4.00                    | 0.168 | 8 | .200* | 0.929              | 8  | 0.508 |
|          | 5.00                    | 0.187 | 5 | .200* | 0.941              | 5  | 0.671 |
|          | 6.00                    | 0.274 | 5 | .200* | 0.882              | 5  | 0.316 |

4F

**Test of Normality**

|          | Kolmogorov-Smirnov test |       |   |  | Shapiro-Wilks test | df | SIG   |
|----------|-------------------------|-------|---|--|--------------------|----|-------|
|          |                         |       |   |  |                    |    |       |
| VAR00002 | 1.00                    | 0.367 | 3 |  | 0.794              | 3  | 0.100 |
|          | 2.00                    | 0.189 | 3 |  | 0.998              | 3  | 0.908 |

|      |       |   |  |       |   |       |
|------|-------|---|--|-------|---|-------|
| 3.00 | 0.289 | 3 |  | 0.927 | 3 | 0.477 |
| 4.00 | 0.359 | 3 |  | 0.810 | 3 | 0.138 |
| 5.00 | 0.368 | 3 |  | 0.792 | 3 | 0.095 |
| 6.00 | 0.365 | 3 |  | 0.796 | 3 | 0.106 |

### Test of Normality

|                         |      |       |   |  | Shapiro-Wilks test | df | SIG   |
|-------------------------|------|-------|---|--|--------------------|----|-------|
| Kolmogorov-Smirnov test |      |       |   |  |                    |    |       |
| VAR00002                | 1.00 | 0.237 | 3 |  | 0.976              | 3  | 0.706 |
|                         | 2.00 | 0.225 | 3 |  | 0.984              | 3  | 0.759 |
|                         | 3.00 | 0.341 | 3 |  | 0.847              | 3  | 0.234 |
|                         | 4.00 | 0.176 | 3 |  | 1.000              | 3  | 0.977 |
|                         | 5.00 | 0.356 | 3 |  | 0.817              | 3  | 0.155 |
|                         | 6.00 | 0.302 | 3 |  | 0.910              | 3  | 0.418 |

### Test of Normality

|                         |      |       |   |  | Shapiro-Wilks test | df | SIG   |
|-------------------------|------|-------|---|--|--------------------|----|-------|
| Kolmogorov-Smirnov test |      |       |   |  |                    |    |       |
| VAR00002                | 1.00 | 0.367 | 3 |  | 0.794              | 3  | 0.099 |
|                         | 2.00 | 0.339 | 3 |  | 0.850              | 3  | 0.241 |
|                         | 3.00 | 0.352 | 3 |  | 0.826              | 3  | 0.178 |
|                         | 4.00 | 0.317 | 3 |  | 0.888              | 3  | 0.347 |
|                         | 5.00 | 0.221 | 3 |  | 0.986              | 3  | 0.773 |
|                         | 6.00 | 0.347 | 3 |  | 0.836              | 3  | 0.203 |

4H

### Test of Normality

|                         |      |       |   |       | Shapiro-Wilks test | df | SIG   |
|-------------------------|------|-------|---|-------|--------------------|----|-------|
| Kolmogorov-Smirnov test |      |       |   |       |                    |    |       |
| VAR00002                | 1.00 | 0.224 | 8 | .200* | 0.911              | 8  | 0.361 |
|                         | 2.00 | 0.161 | 5 | .200* | 0.980              | 5  | 0.934 |
|                         | 3.00 | 0.208 | 8 | .200* | 0.954              | 8  | 0.753 |
|                         | 4.00 | 0.197 | 5 | .200* | 0.947              | 5  | 0.716 |

### Test of Normality

|                         |      |       |   |       | Shapiro-Wilks test | df | SIG   |
|-------------------------|------|-------|---|-------|--------------------|----|-------|
| Kolmogorov-Smirnov test |      |       |   |       |                    |    |       |
| VAR00002                | 1.00 | 0.201 | 8 | .200* | 0.933              | 8  | 0.548 |
|                         | 2.00 | 0.158 | 5 | .200* | 0.966              | 5  | 0.850 |
|                         | 3.00 | 0.222 | 8 | .200* | 0.884              | 8  | 0.204 |
|                         | 4.00 | 0.172 | 5 | .200* | 0.973              | 5  | 0.896 |

4I

**Test of Normality**

|                         |      |       |   |       | Shapiro-<br>Wilks test |    |       |
|-------------------------|------|-------|---|-------|------------------------|----|-------|
| Kolmogorov-Smirnov test |      |       |   |       |                        | df | SIG   |
| VAR00002                | 1.00 | 0.173 | 8 | .200* | 0.964                  | 8  | 0.845 |
|                         | 2.00 | 0.182 | 5 | .200* | 0.922                  | 5  | 0.542 |
|                         | 3.00 | 0.198 | 8 | .200* | 0.945                  | 8  | 0.659 |
|                         | 4.00 | 0.223 | 5 | .200* | 0.958                  | 5  | 0.793 |

4J

**Test of Normality**

|                         |      |       |   |       | Shapiro-<br>Wilks test |    |       |
|-------------------------|------|-------|---|-------|------------------------|----|-------|
| Kolmogorov-Smirnov test |      |       |   |       |                        | df | SIG   |
| VAR00002                | 1.00 | 0.206 | 8 | .200* | 0.864                  | 8  | 0.130 |
|                         | 2.00 | 0.225 | 5 | .200* | 0.916                  | 5  | 0.504 |
|                         | 3.00 | 0.177 | 8 | .200* | 0.972                  | 8  | 0.910 |
|                         | 4.00 | 0.222 | 5 | .200* | 0.866                  | 5  | 0.250 |

**Test of Normality**

|                         |      |       |   |       | Shapiro-<br>Wilks test |    |       |
|-------------------------|------|-------|---|-------|------------------------|----|-------|
| Kolmogorov-Smirnov test |      |       |   |       |                        | df | SIG   |
| VAR00002                | 1.00 | 0.210 | 8 | .200* | 0.945                  | 8  | 0.656 |
|                         | 2.00 | 0.244 | 5 | .200* | 0.890                  | 5  | 0.357 |
|                         | 3.00 | 0.232 | 8 | .200* | 0.857                  | 8  | 0.111 |
|                         | 4.00 | 0.271 | 5 | .200* | 0.902                  | 5  | 0.419 |

4L

**Test of Normality**

|                         |      |       |   |  | Shapiro-<br>Wilks test |    |       |
|-------------------------|------|-------|---|--|------------------------|----|-------|
| Kolmogorov-Smirnov test |      |       |   |  |                        | df | SIG   |
| VAR00002                | 1.00 | 0.350 | 3 |  | 0.829                  | 3  | 0.185 |
|                         | 2.00 | 0.328 | 3 |  | 0.871                  | 3  | 0.298 |
|                         | 3.00 | 0.188 | 3 |  | 0.998                  | 3  | 0.912 |
|                         | 4.00 | 0.263 | 3 |  | 0.956                  | 3  | 0.594 |

**Test of Normality**

|                         |      |       |   |  | Shapiro-<br>Wilks test |    |       |
|-------------------------|------|-------|---|--|------------------------|----|-------|
| Kolmogorov-Smirnov test |      |       |   |  |                        | df | SIG   |
| VAR00002                | 1.00 | 0.362 | 3 |  | 0.805                  | 3  | 0.127 |
|                         | 2.00 | 0.245 | 3 |  | 0.970                  | 3  | 0.670 |
|                         | 3.00 | 0.287 | 3 |  | 0.930                  | 3  | 0.487 |
|                         | 4.00 | 0.228 | 3 |  | 0.982                  | 3  | 0.745 |



**Test of Normality**

|                         |      |       |   |  | Shapiro-Wilks test |    |       |
|-------------------------|------|-------|---|--|--------------------|----|-------|
|                         |      |       |   |  |                    | df | SIG   |
| Kolmogorov-Smirnov test |      |       |   |  |                    |    |       |
| VAR00002                | 1.00 | 0.314 | 3 |  | 0.892              | 3  | 0.362 |
|                         | 2.00 | 0.221 | 3 |  | 0.986              | 3  | 0.773 |
|                         | 3.00 | 0.181 | 3 |  | 0.999              | 3  | 0.942 |
|                         | 4.00 | 0.176 | 3 |  | 1.000              | 3  | 0.981 |

**5C**

**Test of Normality**

|                         |      |       |   |  | Shapiro-Wilks test |    |       |
|-------------------------|------|-------|---|--|--------------------|----|-------|
|                         |      |       |   |  |                    | df | SIG   |
| Kolmogorov-Smirnov test |      |       |   |  |                    |    |       |
| VAR00002                | 1.00 | 0.255 | 3 |  | 0.963              | 3  | 0.628 |
|                         | 2.00 | 0.252 | 3 |  | 0.965              | 3  | 0.641 |

**Test of Normality**

|                         |      |       |   |  | Shapiro-Wilks test |    |       |
|-------------------------|------|-------|---|--|--------------------|----|-------|
|                         |      |       |   |  |                    | df | SIG   |
| Kolmogorov-Smirnov test |      |       |   |  |                    |    |       |
| VAR00002                | 1.00 | 0.201 | 3 |  | 0.995              | 3  | 0.859 |
|                         | 2.00 | 0.339 | 3 |  | 0.850              | 3  | 0.240 |

**5D**

**Test of Normality**

|                         |      |       |   |  | Shapiro-Wilks test |    |       |
|-------------------------|------|-------|---|--|--------------------|----|-------|
|                         |      |       |   |  |                    | df | SIG   |
| Kolmogorov-Smirnov test |      |       |   |  |                    |    |       |
| VAR00002                | 1.00 | 0.225 | 3 |  | 0.984              | 3  | 0.755 |
|                         | 2.00 | 0.186 | 3 |  | 0.998              | 3  | 0.921 |
|                         | 3.00 | 0.371 | 3 |  | 0.785              | 3  | 0.078 |
|                         | 4.00 | 0.183 | 3 |  | 0.999              | 3  | 0.931 |

**Test of Normality**

|                         |      |       |   |  | Shapiro-Wilks test |    |       |
|-------------------------|------|-------|---|--|--------------------|----|-------|
|                         |      |       |   |  |                    | df | SIG   |
| Kolmogorov-Smirnov test |      |       |   |  |                    |    |       |
| VAR00002                | 1.00 | 0.355 | 3 |  | 0.820              | 3  | 0.163 |
|                         | 2.00 | 0.254 | 3 |  | 0.964              | 3  | 0.635 |
|                         | 3.00 | 0.321 | 3 |  | 0.881              | 3  | 0.328 |
|                         | 4.00 | 0.375 | 3 |  | 0.775              | 3  | 0.057 |

5E

**Test of Normality**

|                         |      |       |   | Shapiro-Wilks test | df | SIG   |
|-------------------------|------|-------|---|--------------------|----|-------|
| Kolmogorov-Smirnov test |      |       |   |                    |    |       |
| VAR00002                | 1.00 | 0.266 | 3 | 0.952              | 3  | 0.578 |
|                         | 2.00 | 0.337 | 3 | 0.854              | 3  | 0.252 |
|                         | 3.00 | 0.234 | 3 | 0.979              | 3  | 0.719 |
|                         | 4.00 | 0.330 | 3 | 0.866              | 3  | 0.285 |

**Test of Normality**

|                         |      |       |   | Shapiro-Wilks test | df | SIG   |
|-------------------------|------|-------|---|--------------------|----|-------|
| Kolmogorov-Smirnov test |      |       |   |                    |    |       |
| VAR00002                | 1.00 | 0.324 | 3 | 0.876              | 3  | 0.313 |
|                         | 2.00 | 0.182 | 3 | 0.999              | 3  | 0.937 |
|                         | 3.00 | 0.267 | 3 | 0.952              | 3  | 0.577 |
|                         | 4.00 | 0.243 | 3 | 0.972              | 3  | 0.679 |

5F

**Test of Normality**

|                         |      |       |   | Shapiro-Wilks test | df | SIG   |
|-------------------------|------|-------|---|--------------------|----|-------|
| Kolmogorov-Smirnov test |      |       |   |                    |    |       |
| VAR00002                | 1.00 | 0.178 | 3 | 0.999              | 3  | 0.955 |
|                         | 2.00 | 0.236 | 3 | 0.977              | 3  | 0.711 |
|                         | 3.00 | 0.219 | 3 | 0.987              | 3  | 0.781 |
|                         | 4.00 | 0.203 | 3 | 0.994              | 3  | 0.849 |

**Test of Normality**

|                         |      |       |   | Shapiro-Wilks test | df | SIG   |
|-------------------------|------|-------|---|--------------------|----|-------|
| Kolmogorov-Smirnov test |      |       |   |                    |    |       |
| VAR00002                | 1.00 | 0.204 | 3 | 0.994              | 3  | 0.847 |
|                         | 2.00 | 0.304 | 3 | 0.907              | 3  | 0.409 |
|                         | 3.00 | 0.302 | 3 | 0.910              | 3  | 0.417 |
|                         | 4.00 | 0.330 | 3 | 0.866              | 3  | 0.284 |

**Test of Normality**

|                         |      |       |   | Shapiro-Wilks test | df | SIG   |
|-------------------------|------|-------|---|--------------------|----|-------|
| Kolmogorov-Smirnov test |      |       |   |                    |    |       |
| VAR00002                | 1.00 | 0.274 | 3 | 0.944              | 3  | 0.543 |
|                         | 2.00 | 0.257 | 3 | 0.960              | 3  | 0.618 |
|                         | 3.00 | 0.209 | 3 | 0.992              | 3  | 0.824 |
|                         | 4.00 | 0.182 | 3 | 0.999              | 3  | 0.937 |

**Test of Normality**

|                         |      |       |   |  | Shapiro-Wilks test |    |       |
|-------------------------|------|-------|---|--|--------------------|----|-------|
| Kolmogorov-Smirnov test |      |       |   |  |                    | df | SIG   |
| VAR00002                | 1.00 | 0.366 | 3 |  | 0.795              | 3  | 0.104 |
|                         | 2.00 | 0.187 | 3 |  | 0.998              | 3  | 0.914 |
|                         | 3.00 | 0.178 | 3 |  | 1.000              | 3  | 0.958 |
|                         | 4.00 | 0.290 | 3 |  | 0.926              | 3  | 0.473 |

**6B**

**Test of Normality**

|                         |      |       |   |  | Shapiro-Wilks test |    |       |
|-------------------------|------|-------|---|--|--------------------|----|-------|
| Kolmogorov-Smirnov test |      |       |   |  |                    | df | SIG   |
| VAR00002                | 1.00 | 0.235 | 3 |  | 0.978              | 3  | 0.714 |
|                         | 2.00 | 0.355 | 3 |  | 0.818              | 3  | 0.159 |

**6C**

**Test of Normality**

|                         |      |       |   |       | Shapiro-Wilks test |    |       |
|-------------------------|------|-------|---|-------|--------------------|----|-------|
| Kolmogorov-Smirnov test |      |       |   |       |                    | df | SIG   |
| VAR00002                | 1.00 | 0.160 | 5 | .200* | 0.984              | 5  | 0.953 |
|                         | 2.00 | 0.170 | 5 | .200* | 0.975              | 5  | 0.908 |

**Test of Normality**

|                         |      |       |   |       | Shapiro-Wilks test |    |       |
|-------------------------|------|-------|---|-------|--------------------|----|-------|
| Kolmogorov-Smirnov test |      |       |   |       |                    | df | SIG   |
| VAR00002                | 1.00 | 0.230 | 5 | .200* | 0.915              | 5  | 0.500 |
|                         | 2.00 | 0.233 | 5 | .200* | 0.944              | 5  | 0.696 |

**Test of Normality**

|                         |      |       |   |       | Shapiro-Wilks test |    |       |
|-------------------------|------|-------|---|-------|--------------------|----|-------|
| Kolmogorov-Smirnov test |      |       |   |       |                    | df | SIG   |
| VAR00002                | 1.00 | 0.233 | 5 | .200* | 0.867              | 5  | 0.256 |
|                         | 2.00 | 0.199 | 5 | .200* | 0.943              | 5  | 0.690 |

**6D**

**Test of Normality**

|                         |      |       |   |       | Shapiro-Wilks test |    |       |
|-------------------------|------|-------|---|-------|--------------------|----|-------|
| Kolmogorov-Smirnov test |      |       |   |       |                    | df | SIG   |
| VAR00002                | 1.00 | 0.272 | 5 | .200* | 0.841              | 5  | 0.168 |
|                         | 2.00 | 0.220 | 5 | .200* | 0.932              | 5  | 0.607 |
|                         | 3.00 | 0.225 | 5 | .200* | 0.944              | 5  | 0.695 |
|                         | 4.00 | 0.283 | 5 | .200* | 0.784              | 5  | 0.060 |

**Test of Normality**

| Kolmogorov-Smirnov test |      |       |   |       | Shapiro-Wilks test | df | SIG   |
|-------------------------|------|-------|---|-------|--------------------|----|-------|
| VAR00002                | 1.00 | 0.212 | 5 | .200* | 0.889              | 5  | 0.354 |
|                         | 2.00 | 0.221 | 5 | .200* | 0.927              | 5  | 0.577 |
|                         | 3.00 | 0.263 | 5 | .200* | 0.901              | 5  | 0.416 |
|                         | 4.00 | 0.398 | 5 | 0.010 | 0.718              | 4  | 0.254 |

**Test of Normality**

| Kolmogorov-Smirnov test |      |       |   |       | Shapiro-Wilks test | df | SIG   |
|-------------------------|------|-------|---|-------|--------------------|----|-------|
| VAR00002                | 1.00 | 0.217 | 5 | .200* | 0.945              | 5  | 0.703 |
|                         | 2.00 | 0.218 | 5 | .200* | 0.918              | 5  | 0.516 |
|                         | 3.00 | 0.257 | 5 | .200* | 0.905              | 5  | 0.440 |
|                         | 4.00 | 0.324 | 5 | 0.094 | 0.849              | 5  | 0.191 |

**6F**

**Test of Normality**

| Kolmogorov-Smirnov test |      |       |   |       | Shapiro-Wilks test | df | SIG   |
|-------------------------|------|-------|---|-------|--------------------|----|-------|
| VAR00002                | 1.00 | 0.191 | 8 | .200* | 0.904              | 8  | 0.315 |
|                         | 2.00 | 0.253 | 5 | .200* | 0.920              | 5  | 0.532 |
|                         | 3.00 | 0.354 | 8 | 0.004 | 0.789              | 6  | 0.081 |
|                         | 4.00 | 0.230 | 5 | .200* | 0.850              | 5  | 0.195 |

**Test of Normality**

| Kolmogorov-Smirnov test |      |       |   |       | Shapiro-Wilks test | df | SIG   |
|-------------------------|------|-------|---|-------|--------------------|----|-------|
| VAR00002                | 1.00 | 0.221 | 8 | .200* | 0.927              | 8  | 0.493 |
|                         | 2.00 | 0.212 | 5 | .200* | 0.912              | 5  | 0.481 |
|                         | 3.00 | 0.276 | 8 | 0.073 | 0.836              | 8  | 0.068 |
|                         | 4.00 | 0.233 | 5 | .200* | 0.902              | 5  | 0.423 |

**6G**

**Test of Normality**

| Kolmogorov-Smirnov test |      |       |   |       | Shapiro-Wilks test | df | SIG   |
|-------------------------|------|-------|---|-------|--------------------|----|-------|
| VAR00002                | 1.00 | 0.166 | 8 | .200* | 0.964              | 8  | 0.846 |
|                         | 2.00 | 0.266 | 5 | .200* | 0.888              | 5  | 0.348 |
|                         | 3.00 | 0.167 | 8 | .200* | 0.932              | 8  | 0.532 |
|                         | 4.00 | 0.178 | 5 | .200* | 0.982              | 5  | 0.944 |

**6H****Test of Normality**

|                         |      |       |   |       | Shapiro-Wilks test |    |       |
|-------------------------|------|-------|---|-------|--------------------|----|-------|
| Kolmogorov-Smirnov test |      |       |   |       |                    | df | SIG   |
| VAR00002                | 1.00 | 0.165 | 8 | .200* | 0.948              | 8  | 0.694 |
|                         | 2.00 | 0.174 | 5 | .200* | 0.950              | 5  | 0.740 |
|                         | 3.00 | 0.125 | 8 | .200* | 0.966              | 8  | 0.869 |
|                         | 4.00 | 0.224 | 5 | .200* | 0.912              | 5  | 0.477 |

**Test of Normality**

|                         |      |       |   |       | Shapiro-Wilks test |    |       |
|-------------------------|------|-------|---|-------|--------------------|----|-------|
| Kolmogorov-Smirnov test |      |       |   |       |                    | df | SIG   |
| VAR00002                | 1.00 | 0.143 | 8 | .200* | 0.976              | 8  | 0.939 |
|                         | 2.00 | 0.194 | 5 | .200* | 0.954              | 5  | 0.763 |
|                         | 3.00 | 0.217 | 8 | .200* | 0.842              | 8  | 0.079 |
|                         | 4.00 | 0.198 | 5 | .200* | 0.930              | 5  | 0.596 |

**6J****Test of Normality**

|                         |      |       |   |  | Shapiro-Wilks test |    |       |
|-------------------------|------|-------|---|--|--------------------|----|-------|
| Kolmogorov-Smirnov test |      |       |   |  |                    | df | SIG   |
| VAR00002                | 1.00 | 0.274 | 3 |  | 0.944              | 3  | 0.544 |
|                         | 2.00 | 0.319 | 3 |  | 0.885              | 3  | 0.338 |
|                         | 3.00 | 0.344 | 3 |  | 0.841              | 3  | 0.217 |
|                         | 4.00 | 0.242 | 3 |  | 0.973              | 3  | 0.685 |

**Test of Normality**

|                         |      |       |   |  | Shapiro-Wilks test |    |       |
|-------------------------|------|-------|---|--|--------------------|----|-------|
| Kolmogorov-Smirnov test |      |       |   |  |                    | df | SIG   |
| VAR00002                | 1.00 | 0.369 | 3 |  | 0.789              | 3  | 0.089 |
|                         | 2.00 | 0.226 | 3 |  | 0.984              | 3  | 0.754 |
|                         | 3.00 | 0.216 | 3 |  | 0.988              | 3  | 0.795 |
|                         | 4.00 | 0.204 | 3 |  | 0.993              | 3  | 0.844 |

**Test of Normality**

|                         |      |       |   |  | Shapiro-Wilks test |    |       |
|-------------------------|------|-------|---|--|--------------------|----|-------|
| Kolmogorov-Smirnov test |      |       |   |  |                    | df | SIG   |
| VAR00002                | 1.00 | 0.328 | 3 |  | 0.870              | 3  | 0.296 |
|                         | 2.00 | 0.367 | 3 |  | 0.792              | 3  | 0.096 |
|                         | 3.00 | 0.256 | 3 |  | 0.961              | 3  | 0.622 |
|                         | 4.00 | 0.334 | 3 |  | 0.860              | 3  | 0.269 |

**6K****Test of Normality**

|                         |      |       |   |       | Shapiro-<br>Wilks test |    |       |
|-------------------------|------|-------|---|-------|------------------------|----|-------|
| Kolmogorov-Smirnov test |      |       |   |       |                        | df | SIG   |
| VAR00002                | 1.00 | 0.149 | 8 | .200* | 0.951                  | 8  | 0.721 |
|                         | 2.00 | 0.185 | 8 | .200* | 0.913                  | 8  | 0.376 |
|                         | 3.00 | 0.184 | 8 | .200* | 0.952                  | 8  | 0.732 |
|                         | 4.00 | 0.236 | 8 | .200* | 0.923                  | 8  | 0.455 |

**Test of Normality**

|                         |      |       |   |       | Shapiro-<br>Wilks test |    |       |
|-------------------------|------|-------|---|-------|------------------------|----|-------|
| Kolmogorov-Smirnov test |      |       |   |       |                        | df | SIG   |
| VAR00002                | 1.00 | 0.229 | 8 | .200* | 0.830                  | 8  | 0.059 |
|                         | 2.00 | 0.143 | 8 | .200* | 0.957                  | 8  | 0.778 |
|                         | 3.00 | 0.298 | 8 | 0.035 | 0.888                  | 8  | 0.224 |
|                         | 4.00 | 0.198 | 8 | .200* | 0.917                  | 8  | 0.409 |

**6L****Test of Normality**

|                         |      |       |   |       | Shapiro-<br>Wilks test |    |       |
|-------------------------|------|-------|---|-------|------------------------|----|-------|
| Kolmogorov-Smirnov test |      |       |   |       |                        | df | SIG   |
| VAR00002                | 1.00 | 0.144 | 8 | .200* | 0.955                  | 8  | 0.759 |
|                         | 2.00 | 0.161 | 8 | .200* | 0.971                  | 8  | 0.906 |
|                         | 3.00 | 0.166 | 8 | .200* | 0.907                  | 8  | 0.330 |
|                         | 4.00 | 0.191 | 8 | .200* | 0.924                  | 8  | 0.461 |

**6M****Test of Normality**

|                         |      |       |   |       | Shapiro-<br>Wilks test |    |       |
|-------------------------|------|-------|---|-------|------------------------|----|-------|
| Kolmogorov-Smirnov test |      |       |   |       |                        | df | SIG   |
| VAR00002                | 1.00 | 0.241 | 8 | 0.192 | 0.905                  | 8  | 0.319 |
|                         | 2.00 | 0.268 | 8 | 0.094 | 0.809                  | 8  | 0.036 |
|                         | 3.00 | 0.206 | 8 | .200* | 0.868                  | 8  | 0.145 |
|                         | 4.00 | 0.172 | 8 | .200* | 0.937                  | 8  | 0.585 |

**Test of Normality**

|                         |      |       |   |       | Shapiro-<br>Wilks test |    |       |
|-------------------------|------|-------|---|-------|------------------------|----|-------|
| Kolmogorov-Smirnov test |      |       |   |       |                        | df | SIG   |
| VAR00002                | 1.00 | 0.218 | 8 | .200* | 0.877                  | 8  | 0.177 |
|                         | 2.00 | 0.229 | 8 | .200* | 0.913                  | 8  | 0.377 |
|                         | 3.00 | 0.198 | 8 | .200* | 0.886                  | 8  | 0.215 |
|                         | 4.00 | 0.193 | 8 | .200* | 0.926                  | 8  | 0.482 |

6N

**Test of Normality**

|                         |      |       |   |  | Shapiro-Wilks test |    |       |
|-------------------------|------|-------|---|--|--------------------|----|-------|
|                         |      |       |   |  |                    | df | SIG   |
| Kolmogorov-Smirnov test |      |       |   |  |                    |    |       |
| VAR00002                | 1.00 | 0.232 | 3 |  | 0.980              | 3  | 0.727 |
|                         | 2.00 | 0.266 | 3 |  | 0.952              | 3  | 0.580 |
|                         | 3.00 | 0.369 | 3 |  | 0.789              | 3  | 0.089 |
|                         | 4.00 | 0.206 | 3 |  | 0.993              | 3  | 0.837 |

**Test of Normality**

|                         |      |       |   |  | Shapiro-Wilks test |    |       |
|-------------------------|------|-------|---|--|--------------------|----|-------|
|                         |      |       |   |  |                    | df | SIG   |
| Kolmogorov-Smirnov test |      |       |   |  |                    |    |       |
| VAR00002                | 1.00 | 0.352 | 3 |  | 0.825              | 3  | 0.174 |
|                         | 2.00 | 0.363 | 3 |  | 0.803              | 3  | 0.122 |
|                         | 3.00 | 0.319 | 3 |  | 0.885              | 3  | 0.339 |
|                         | 4.00 | 0.215 | 3 |  | 0.989              | 3  | 0.799 |

**Test of Normality**

|                         |      |       |   |  | Shapiro-Wilks test |    |       |
|-------------------------|------|-------|---|--|--------------------|----|-------|
|                         |      |       |   |  |                    | df | SIG   |
| Kolmogorov-Smirnov test |      |       |   |  |                    |    |       |
| VAR00002                | 1.00 | 0.198 | 3 |  | 0.995              | 3  | 0.869 |
|                         | 2.00 | 0.286 | 3 |  | 0.931              | 3  | 0.492 |
|                         | 3.00 | 0.344 | 3 |  | 0.841              | 3  | 0.217 |
|                         | 4.00 | 0.261 | 3 |  | 0.957              | 3  | 0.603 |

7A

**Test of Normality**

|                         |      |       |   |  | Shapiro-Wilks test |    |       |
|-------------------------|------|-------|---|--|--------------------|----|-------|
|                         |      |       |   |  |                    | df | SIG   |
| Kolmogorov-Smirnov test |      |       |   |  |                    |    |       |
| VAR00002                | 1.00 | 0.314 | 3 |  | 0.893              | 3  | 0.364 |
|                         | 2.00 | 0.256 | 3 |  | 0.962              | 3  | 0.625 |
|                         | 3.00 | 0.258 | 3 |  | 0.960              | 3  | 0.617 |
|                         | 4.00 | 0.205 | 3 |  | 0.993              | 3  | 0.839 |

**Test of Normality**

|                         |      |       |   |       | Shapiro-Wilks test |    |       |
|-------------------------|------|-------|---|-------|--------------------|----|-------|
|                         |      |       |   |       |                    | df | SIG   |
| Kolmogorov-Smirnov test |      |       |   |       |                    |    |       |
| VAR00002                | 1.00 | 0.234 | 5 | .200* | 0.934              | 5  | 0.624 |
|                         | 2.00 | 0.179 | 5 | .200* | 0.982              | 5  | 0.947 |
|                         | 3.00 | 0.251 | 5 | .200* | 0.894              | 5  | 0.376 |

|      |       |   |       |       |   |       |
|------|-------|---|-------|-------|---|-------|
| 4.00 | 0.314 | 5 | 0.119 | 0.858 | 5 | 0.222 |
|------|-------|---|-------|-------|---|-------|

**7B**

**Test of Normality**

|          | Kolmogorov-Smirnov test |       |   |  | Shapiro-Wilks test | df | SIG   |
|----------|-------------------------|-------|---|--|--------------------|----|-------|
|          |                         |       |   |  |                    |    |       |
| VAR00002 | 1.00                    | 0.233 | 3 |  | 0.979              | 3  | 0.721 |
|          | 2.00                    | 0.250 | 3 |  | 0.967              | 3  | 0.650 |
|          | 3.00                    | 0.297 | 3 |  | 0.917              | 3  | 0.442 |
|          | 4.00                    | 0.339 | 3 |  | 0.851              | 3  | 0.242 |

**Test of Normality**

|          | Kolmogorov-Smirnov test |       |   |       | Shapiro-Wilks test | df | SIG   |
|----------|-------------------------|-------|---|-------|--------------------|----|-------|
|          |                         |       |   |       |                    |    |       |
| VAR00002 | 1.00                    | 0.303 | 5 | 0.150 | 0.777              | 5  | 0.052 |
|          | 2.00                    | 0.303 | 5 | 0.150 | 0.830              | 5  | 0.138 |
|          | 3.00                    | 0.233 | 5 | .200* | 0.850              | 5  | 0.194 |
|          | 4.00                    | 0.343 | 5 | 0.055 | 0.740              | 5  | 0.024 |

**7C**

**Test of Normality**

|          | Kolmogorov-Smirnov test |       |   |  | Shapiro-Wilks test | df | SIG   |
|----------|-------------------------|-------|---|--|--------------------|----|-------|
|          |                         |       |   |  |                    |    |       |
| VAR00002 | 1.00                    | 0.233 | 3 |  | 0.979              | 3  | 0.721 |
|          | 2.00                    | 0.243 | 3 |  | 0.972              | 3  | 0.682 |
|          | 3.00                    | 0.297 | 3 |  | 0.917              | 3  | 0.442 |
|          | 4.00                    | 0.335 | 3 |  | 0.858              | 3  | 0.263 |

**Test of Normality**

|          | Kolmogorov-Smirnov test |       |   |       | Shapiro-Wilks test | df | SIG   |
|----------|-------------------------|-------|---|-------|--------------------|----|-------|
|          |                         |       |   |       |                    |    |       |
| VAR00002 | 1.00                    | 0.303 | 5 | 0.150 | 0.777              | 5  | 0.052 |
|          | 2.00                    | 0.221 | 5 | .200* | 0.918              | 5  | 0.516 |
|          | 3.00                    | 0.233 | 5 | .200* | 0.850              | 5  | 0.194 |
|          | 4.00                    | 0.280 | 5 | .200* | 0.887              | 5  | 0.344 |

**7E**

**Test of Normality**

|          | Kolmogorov-Smirnov test |       |   |  | Shapiro-Wilks test | df | SIG   |
|----------|-------------------------|-------|---|--|--------------------|----|-------|
|          |                         |       |   |  |                    |    |       |
| VAR00002 | 1.00                    | 0.323 | 3 |  | 0.879              | 3  | 0.322 |
|          | 2.00                    | 0.297 | 3 |  | 0.917              | 3  | 0.442 |



|  |      |       |   |  |       |   |       |
|--|------|-------|---|--|-------|---|-------|
|  | 3.00 | 0.177 | 3 |  | 1.000 | 3 | 0.966 |
|--|------|-------|---|--|-------|---|-------|

**Test of Normality**

|                         |      |       |   |  | Shapiro-Wilks test | df | SIG   |
|-------------------------|------|-------|---|--|--------------------|----|-------|
| Kolmogorov-Smirnov test |      |       |   |  |                    |    |       |
| VAR00002                | 1.00 | 0.350 | 3 |  | 0.829              | 3  | 0.185 |
|                         | 2.00 | 0.280 | 3 |  | 0.938              | 3  | 0.520 |
|                         | 3.00 | 0.251 | 3 |  | 0.966              | 3  | 0.644 |

**Test of Normality**

|                         |      |       |   |  | Shapiro-Wilks test | df | SIG   |
|-------------------------|------|-------|---|--|--------------------|----|-------|
| Kolmogorov-Smirnov test |      |       |   |  |                    |    |       |
| VAR00002                | 1.00 | 0.317 | 3 |  | 0.888              | 3  | 0.347 |
|                         | 2.00 | 0.302 | 3 |  | 0.910              | 3  | 0.419 |
|                         | 3.00 | 0.177 | 3 |  | 1.000              | 3  | 0.972 |

**7F**

**Test of Normality**

|                         |      |       |   |  | Shapiro-Wilks test | df | SIG   |
|-------------------------|------|-------|---|--|--------------------|----|-------|
| Kolmogorov-Smirnov test |      |       |   |  |                    |    |       |
| VAR00002                | 1.00 | 0.292 | 3 |  | 0.924              | 3  | 0.466 |
|                         | 2.00 | 0.230 | 3 |  | 0.981              | 3  | 0.736 |
|                         | 3.00 | 0.285 | 3 |  | 0.932              | 3  | 0.495 |

**Test of Normality**

|                         |      |       |   |  | Shapiro-Wilks test | df | SIG   |
|-------------------------|------|-------|---|--|--------------------|----|-------|
| Kolmogorov-Smirnov test |      |       |   |  |                    |    |       |
| VAR00002                | 1.00 | 0.355 | 3 |  | 0.820              | 3  | 0.163 |
|                         | 2.00 | 0.271 | 3 |  | 0.948              | 3  | 0.561 |
|                         | 3.00 | 0.330 | 3 |  | 0.866              | 3  | 0.285 |

**Test of Normality**

|                         |      |       |   |  | Shapiro-Wilks test | df | SIG   |
|-------------------------|------|-------|---|--|--------------------|----|-------|
| Kolmogorov-Smirnov test |      |       |   |  |                    |    |       |
| VAR00002                | 1.00 | 0.181 | 3 |  | 0.999              | 3  | 0.941 |
|                         | 2.00 | 0.194 | 3 |  | 0.997              | 3  | 0.888 |
|                         | 3.00 | 0.359 | 3 |  | 0.810              | 3  | 0.139 |

**7G**

**Test of Normality**

|                         |  |  |  |  | Shapiro-Wilks test | df | SIG |
|-------------------------|--|--|--|--|--------------------|----|-----|
| Kolmogorov-Smirnov test |  |  |  |  |                    |    |     |
|                         |  |  |  |  |                    |    |     |

|          |      |       |   |  |       | df | SIG   |
|----------|------|-------|---|--|-------|----|-------|
| VAR00002 | 1.00 | 0.245 | 3 |  | 0.971 | 3  | 0.672 |
|          | 2.00 | 0.357 | 3 |  | 0.814 | 3  | 0.149 |
|          | 3.00 | 0.300 | 3 |  | 0.912 | 3  | 0.426 |

### Test of Normality

|                         |      |       |   |  | Shapiro-<br>Wilks test |    |       |
|-------------------------|------|-------|---|--|------------------------|----|-------|
| Kolmogorov-Smirnov test |      |       |   |  |                        | df | SIG   |
| VAR00002                | 1.00 | 0.365 | 3 |  | 0.798                  | 3  | 0.109 |
|                         | 2.00 | 0.361 | 3 |  | 0.807                  | 3  | 0.131 |
|                         | 3.00 | 0.182 | 3 |  | 0.999                  | 3  | 0.938 |

### Test of Normality

|                         |      |       |   |  | Shapiro-<br>Wilks test |    |       |
|-------------------------|------|-------|---|--|------------------------|----|-------|
| Kolmogorov-Smirnov test |      |       |   |  |                        | df | SIG   |
| VAR00002                | 1.00 | 0.216 | 3 |  | 0.989                  | 3  | 0.796 |
|                         | 2.00 | 0.180 | 3 |  | 0.999                  | 3  | 0.943 |
|                         | 3.00 | 0.274 | 3 |  | 0.944                  | 3  | 0.544 |

7H

### Test of Normality

|                         |      |       |   |  | Shapiro-<br>Wilks test |    |       |
|-------------------------|------|-------|---|--|------------------------|----|-------|
| Kolmogorov-Smirnov test |      |       |   |  |                        | df | SIG   |
| VAR00002                | 1.00 | 0.178 | 3 |  | 0.999                  | 3  | 0.954 |
|                         | 2.00 | 0.375 | 3 |  | 0.773                  | 3  | 0.052 |
|                         | 3.00 | 0.338 | 3 |  | 0.852                  | 3  | 0.247 |

### Test of Normality

|                         |      |       |   |  | Shapiro-<br>Wilks test |    |       |
|-------------------------|------|-------|---|--|------------------------|----|-------|
| Kolmogorov-Smirnov test |      |       |   |  |                        | df | SIG   |
| VAR00002                | 1.00 | 0.364 | 3 |  | 0.801                  | 3  | 0.116 |
|                         | 2.00 | 0.276 | 3 |  | 0.943                  | 3  | 0.538 |
|                         | 3.00 | 0.331 | 3 |  | 0.865                  | 3  | 0.282 |

### Test of Normality

|                         |      |       |   |  | Shapiro-<br>Wilks test |    |       |
|-------------------------|------|-------|---|--|------------------------|----|-------|
| Kolmogorov-Smirnov test |      |       |   |  |                        | df | SIG   |
| VAR00002                | 1.00 | 0.228 | 3 |  | 0.982                  | 3  | 0.744 |
|                         | 2.00 | 0.257 | 3 |  | 0.960                  | 3  | 0.618 |
|                         | 3.00 | 0.294 | 3 |  | 0.921                  | 3  | 0.456 |

8A

**Test of Normality**

|          | Kolmogorov-Smirnov test |       |   |  | Shapiro-Wilks test | df | SIG   |
|----------|-------------------------|-------|---|--|--------------------|----|-------|
|          |                         |       |   |  |                    |    |       |
| VAR00002 | 1.00                    | 0.175 | 3 |  | 1.000              | 3  | 0.990 |
|          | 2.00                    | 0.299 | 3 |  | 0.914              | 3  | 0.432 |
|          | 3.00                    | 0.282 | 3 |  | 0.935              | 3  | 0.509 |
|          | 4.00                    | 0.353 | 3 |  | 0.824              | 3  | 0.172 |

**Test of Normality**

|          | Kolmogorov-Smirnov test |       |   |       | Shapiro-Wilks test | df | SIG   |
|----------|-------------------------|-------|---|-------|--------------------|----|-------|
|          |                         |       |   |       |                    |    |       |
| VAR00002 | 1.00                    | 0.191 | 5 | .200* | 0.967              | 5  | 0.859 |
|          | 2.00                    | 0.228 | 5 | .200* | 0.908              | 5  | 0.453 |
|          | 3.00                    | 0.185 | 5 | .200* | 0.963              | 5  | 0.830 |
|          | 4.00                    | 0.263 | 5 | .200* | 0.920              | 5  | 0.531 |

8C

**Test of Normality**

|          | Kolmogorov-Smirnov test |       |   |       | Shapiro-Wilks test | df | SIG   |
|----------|-------------------------|-------|---|-------|--------------------|----|-------|
|          |                         |       |   |       |                    |    |       |
| VAR00002 | 1.00                    | 0.210 | 8 | .200* | 0.909              | 8  | 0.346 |
|          | 2.00                    | 0.163 | 8 | .200* | 0.974              | 8  | 0.924 |
|          | 3.00                    | 0.174 | 7 | .200* | 0.891              | 7  | 0.278 |
|          | 4.00                    | 0.193 | 8 | .200* | 0.937              | 8  | 0.581 |

**Test of Normality**

|          | Kolmogorov-Smirnov test |       |   |       | Shapiro-Wilks test | df | SIG   |
|----------|-------------------------|-------|---|-------|--------------------|----|-------|
|          |                         |       |   |       |                    |    |       |
| VAR00002 | 1.00                    | 0.151 | 8 | .200* | 0.943              | 8  | 0.642 |
|          | 2.00                    | 0.153 | 8 | .200* | 0.951              | 8  | 0.725 |
|          | 3.00                    | 0.281 | 7 | 0.099 | 0.850              | 7  | 0.122 |
|          | 4.00                    | 0.162 | 8 | .200* | 0.976              | 8  | 0.940 |

8E

**Test of Normality**

|          | Kolmogorov-Smirnov test |       |   |       | Shapiro-Wilks test | df | SIG   |
|----------|-------------------------|-------|---|-------|--------------------|----|-------|
|          |                         |       |   |       |                    |    |       |
| VAR00002 | 1.00                    | 0.196 | 8 | .200* | 0.918              | 8  | 0.415 |
|          | 2.00                    | 0.194 | 8 | .200* | 0.965              | 8  | 0.854 |
|          | 3.00                    | 0.153 | 8 | .200* | 0.961              | 8  | 0.820 |
|          | 4.00                    | 0.184 | 8 | .200* | 0.941              | 8  | 0.623 |

**Test of Normality**

|          | Kolmogorov-Smirnov test |       |   |       | Shapiro-Wilks test | df | SIG   |
|----------|-------------------------|-------|---|-------|--------------------|----|-------|
|          |                         |       |   |       |                    |    |       |
| VAR00002 | 1.00                    | 0.252 | 8 | 0.145 | 0.925              | 8  | 0.473 |
|          | 2.00                    | 0.158 | 8 | .200* | 0.962              | 8  | 0.832 |
|          | 3.00                    | 0.227 | 8 | .200* | 0.866              | 8  | 0.139 |
|          | 4.00                    | 0.180 | 8 | .200* | 0.961              | 8  | 0.819 |

**8D**

**Test of Normality**

|          | Kolmogorov-Smirnov test |       |   |       | Shapiro-Wilks test | df | SIG   |
|----------|-------------------------|-------|---|-------|--------------------|----|-------|
|          |                         |       |   |       |                    |    |       |
| VAR00002 | 1.00                    | 0.158 | 8 | .200* | 0.952              | 8  | 0.730 |
|          | 2.00                    | 0.190 | 8 | .200* | 0.927              | 8  | 0.489 |
|          | 3.00                    | 0.210 | 8 | .200* | 0.939              | 8  | 0.601 |
|          | 4.00                    | 0.156 | 8 | .200* | 0.974              | 8  | 0.927 |

**8G**

**Test of Normality**

|          | Kolmogorov-Smirnov test |       |   |  | Shapiro-Wilks test | df | SIG   |
|----------|-------------------------|-------|---|--|--------------------|----|-------|
|          |                         |       |   |  |                    |    |       |
| VAR00002 | 1.00                    | 0.251 | 3 |  | 0.966              | 3  | 0.644 |
|          | 2.00                    | 0.316 | 3 |  | 0.889              | 3  | 0.352 |
|          | 3.00                    | 0.183 | 3 |  | 0.999              | 3  | 0.932 |
|          | 4.00                    | 0.208 | 3 |  | 0.992              | 3  | 0.826 |

**Test of Normality**

|          | Kolmogorov-Smirnov test |       |   |  | Shapiro-Wilks test | df | SIG   |
|----------|-------------------------|-------|---|--|--------------------|----|-------|
|          |                         |       |   |  |                    |    |       |
| VAR00002 | 1.00                    | 0.203 | 3 |  | 0.994              | 3  | 0.849 |
|          | 2.00                    | 0.192 | 3 |  | 0.997              | 3  | 0.896 |
|          | 3.00                    | 0.257 | 3 |  | 0.961              | 3  | 0.619 |
|          | 4.00                    | 0.178 | 3 |  | 0.999              | 3  | 0.952 |

**Test of Normality**

|          | Kolmogorov-Smirnov test |       |   |  | Shapiro-Wilks test | df | SIG   |
|----------|-------------------------|-------|---|--|--------------------|----|-------|
|          |                         |       |   |  |                    |    |       |
| VAR00002 | 1.00                    | 0.364 | 3 |  | 0.800              | 3  | 0.114 |
|          | 2.00                    | 0.276 | 3 |  | 0.942              | 3  | 0.537 |
|          | 3.00                    | 0.356 | 3 |  | 0.818              | 3  | 0.157 |
|          | 4.00                    | 0.328 | 3 |  | 0.871              | 3  | 0.298 |

8I

**Test of Normality**

| Kolmogorov-Smirnov test |      |       |   |       | Shapiro-Wilks test | df | SIG   |
|-------------------------|------|-------|---|-------|--------------------|----|-------|
| VAR00002                | 1.00 | 0.218 | 8 | .200* | 0.857              | 8  | 0.112 |
|                         | 2.00 | 0.165 | 8 | .200* | 0.944              | 8  | 0.649 |
|                         | 3.00 | 0.225 | 8 | .200* | 0.893              | 8  | 0.251 |
|                         | 4.00 | 0.195 | 8 | .200* | 0.932              | 8  | 0.535 |

**Test of Normality**

| Kolmogorov-Smirnov test |      |       |   |       | Shapiro-Wilks test | df | SIG   |
|-------------------------|------|-------|---|-------|--------------------|----|-------|
| VAR00002                | 1.00 | 0.138 | 8 | .200* | 0.986              | 8  | 0.986 |
|                         | 2.00 | 0.232 | 8 | .200* | 0.868              | 8  | 0.145 |
|                         | 3.00 | 0.171 | 8 | .200* | 0.940              | 8  | 0.613 |
|                         | 4.00 | 0.302 | 8 | 0.031 | 0.835              | 8  | 0.067 |

8J

**Test of Normality**

| Kolmogorov-Smirnov test |      |       |   |       | Shapiro-Wilks test | df | SIG   |
|-------------------------|------|-------|---|-------|--------------------|----|-------|
| VAR00002                | 1.00 | 0.125 | 8 | .200* | 0.957              | 8  | 0.777 |
|                         | 2.00 | 0.142 | 8 | .200* | 0.954              | 8  | 0.750 |
|                         | 3.00 | 0.201 | 8 | .200* | 0.839              | 8  | 0.074 |
|                         | 4.00 | 0.153 | 8 | .200* | 0.945              | 8  | 0.660 |

8K

**Test of Normality**

| Kolmogorov-Smirnov test |      |       |   |       | Shapiro-Wilks test | df | SIG   |
|-------------------------|------|-------|---|-------|--------------------|----|-------|
| VAR00002                | 1.00 | 0.196 | 8 | .200* | 0.921              | 8  | 0.440 |
|                         | 2.00 | 0.252 | 8 | 0.143 | 0.905              | 8  | 0.319 |
|                         | 3.00 | 0.239 | 8 | 0.199 | 0.862              | 8  | 0.125 |
|                         | 4.00 | 0.139 | 8 | .200* | 0.962              | 8  | 0.831 |

**Test of Normality**

| Kolmogorov-Smirnov test |      |       |   |       | Shapiro-Wilks test | df | SIG   |
|-------------------------|------|-------|---|-------|--------------------|----|-------|
| VAR00002                | 1.00 | 0.194 | 8 | .200* | 0.918              | 8  | 0.418 |
|                         | 2.00 | 0.246 | 8 | 0.168 | 0.889              | 8  | 0.230 |

|      |       |   |       |       |   |       |
|------|-------|---|-------|-------|---|-------|
| 3.00 | 0.182 | 8 | .200* | 0.901 | 8 | 0.298 |
| 4.00 | 0.178 | 8 | .200* | 0.934 | 8 | 0.554 |

8M

**Test of Normality**

|                         |      |       |   | Shapiro-Wilks test | df | SIG   |
|-------------------------|------|-------|---|--------------------|----|-------|
| Kolmogorov-Smirnov test |      |       |   |                    |    |       |
| VAR00002                | 1.00 | 0.268 | 3 | 0.950              | 3  | 0.570 |
|                         | 2.00 | 0.342 | 3 | 0.846              | 3  | 0.229 |
|                         | 3.00 | 0.369 | 3 | 0.789              | 3  | 0.089 |
|                         | 4.00 | 0.178 | 3 | 0.999              | 3  | 0.953 |

**Test of Normality**

|                         |      |       |   | Shapiro-Wilks test | df | SIG   |
|-------------------------|------|-------|---|--------------------|----|-------|
| Kolmogorov-Smirnov test |      |       |   |                    |    |       |
| VAR00002                | 1.00 | 0.200 | 3 | 0.995              | 3  | 0.860 |
|                         | 2.00 | 0.187 | 3 | 0.998              | 3  | 0.915 |
|                         | 3.00 | 0.295 | 3 | 0.920              | 3  | 0.453 |
|                         | 4.00 | 0.237 | 3 | 0.977              | 3  | 0.708 |

**Test of Normality**

|                         |      |       |   | Shapiro-Wilks test | df | SIG   |
|-------------------------|------|-------|---|--------------------|----|-------|
| Kolmogorov-Smirnov test |      |       |   |                    |    |       |
| VAR00002                | 1.00 | 0.361 | 3 | 0.807              | 3  | 0.131 |
|                         | 2.00 | 0.267 | 3 | 0.951              | 3  | 0.575 |
|                         | 3.00 | 0.193 | 3 | 0.997              | 3  | 0.892 |
|                         | 4.00 | 0.247 | 3 | 0.969              | 3  | 0.662 |

S1C

**Test of Normality**

|                         |      |       |   | Shapiro-Wilks test | df | SIG   |
|-------------------------|------|-------|---|--------------------|----|-------|
| Kolmogorov-Smirnov test |      |       |   |                    |    |       |
| VAR00002                | 1.00 | 0.180 | 3 | 0.999              | 3  | 0.943 |
|                         | 2.00 | 0.321 | 3 | 0.881              | 3  | 0.328 |
|                         | 3.00 | 0.346 | 3 | 0.837              | 3  | 0.207 |
|                         | 4.00 | 0.347 | 3 | 0.834              | 3  | 0.200 |
|                         | 5.00 | 0.200 | 3 | 0.995              | 3  | 0.863 |
|                         | 6.00 | 0.368 | 3 | 0.791              | 3  | 0.092 |

**Test of Normality**

|                         |  |  |  | Shapiro-Wilks test | df | SIG |
|-------------------------|--|--|--|--------------------|----|-----|
| Kolmogorov-Smirnov test |  |  |  |                    |    |     |
|                         |  |  |  |                    |    |     |

|          |      |       |   |  |       | df | SIG   |
|----------|------|-------|---|--|-------|----|-------|
| VAR00002 | 1.00 | 0.260 | 3 |  | 0.958 | 3  | 0.608 |
|          | 2.00 | 0.180 | 3 |  | 0.999 | 3  | 0.947 |
|          | 3.00 | 0.236 | 3 |  | 0.977 | 3  | 0.711 |
|          | 4.00 | 0.365 | 3 |  | 0.796 | 3  | 0.106 |
|          | 5.00 | 0.224 | 3 |  | 0.984 | 3  | 0.759 |
|          | 6.00 | 0.274 | 3 |  | 0.945 | 3  | 0.546 |

**S1D**

**Test of Normality**

| Kolmogorov-Smirnov test |      |       |   |       | Shapiro-Wilks test | df | SIG   |
|-------------------------|------|-------|---|-------|--------------------|----|-------|
| VAR00002                | 1.00 | 0.226 | 5 | .200* | 0.926              | 5  | 0.570 |
|                         | 2.00 | 0.222 | 5 | .200* | 0.970              | 5  | 0.873 |
|                         | 3.00 | 0.155 | 5 | .200* | 0.994              | 5  | 0.991 |
|                         | 4.00 | 0.238 | 5 | .200* | 0.907              | 5  | 0.448 |

**S1E**

**Test of Normality**

| Kolmogorov-Smirnov test |      |       |   |       | Shapiro-Wilks test | df | SIG   |
|-------------------------|------|-------|---|-------|--------------------|----|-------|
| VAR00002                | 1.00 | 0.216 | 5 | .200* | 0.916              | 5  | 0.502 |
|                         | 2.00 | 0.190 | 5 | .200* | 0.961              | 5  | 0.812 |
|                         | 3.00 | 0.148 | 5 | .200* | 0.984              | 5  | 0.956 |
|                         | 4.00 | 0.181 | 5 | .200* | 0.935              | 5  | 0.629 |

**S1G**

**Test of Normality**

| Kolmogorov-Smirnov test |      |       |   |       | Shapiro-Wilks test | df | SIG   |
|-------------------------|------|-------|---|-------|--------------------|----|-------|
| VAR00002                | 1.00 | 0.274 | 5 | .200* | 0.860              | 5  | 0.228 |
|                         | 2.00 | 0.185 | 5 | .200* | 0.945              | 5  | 0.700 |
|                         | 3.00 | 0.297 | 4 |       | 0.768              | 4  | 0.056 |
|                         | 4.00 | 0.206 | 5 | .200* | 0.917              | 5  | 0.511 |

**S1F**

**Test of Normality**

| Kolmogorov-Smirnov test |      |       |   |       | Shapiro-Wilks test | df | SIG   |
|-------------------------|------|-------|---|-------|--------------------|----|-------|
| VAR00002                | 1.00 | 0.173 | 5 | .200* | 0.952              | 5  | 0.755 |
|                         | 2.00 | 0.187 | 5 | .200* | 0.937              | 5  | 0.645 |
|                         | 3.00 | 0.229 | 5 | .200* | 0.960              | 5  | 0.805 |
|                         | 4.00 | 0.320 | 5 | 0.105 | 0.840              | 5  | 0.166 |

**S1H****Test of Normality**

|                         |      |       |   | Shapiro-Wilks test | df | SIG   |
|-------------------------|------|-------|---|--------------------|----|-------|
| Kolmogorov-Smirnov test |      |       |   |                    |    |       |
| VAR00002                | 1.00 | 0.177 | 3 | 1.000              | 3  | 0.965 |
|                         | 2.00 | 0.177 | 3 | 1.000              | 3  | 0.962 |
|                         | 3.00 | 0.178 | 3 | 0.999              | 3  | 0.955 |
|                         | 4.00 | 0.177 | 3 | 1.000              | 3  | 0.962 |

**Test of Normality**

|                         |      |       |   | Shapiro-Wilks test | df | SIG   |
|-------------------------|------|-------|---|--------------------|----|-------|
| Kolmogorov-Smirnov test |      |       |   |                    |    |       |
| VAR00002                | 1.00 | 0.337 | 3 | 0.854              | 3  | 0.250 |
|                         | 2.00 | 0.249 | 3 | 0.967              | 3  | 0.653 |
|                         | 3.00 | 0.291 | 3 | 0.925              | 3  | 0.471 |
|                         | 4.00 | 0.211 | 3 | 0.991              | 3  | 0.817 |

**Test of Normality**

|                         |      |       |   | Shapiro-Wilks test | df | SIG   |
|-------------------------|------|-------|---|--------------------|----|-------|
| Kolmogorov-Smirnov test |      |       |   |                    |    |       |
| VAR00002                | 1.00 | 0.335 | 3 | 0.858              | 3  | 0.263 |
|                         | 2.00 | 0.279 | 3 | 0.939              | 3  | 0.522 |
|                         | 3.00 | 0.345 | 3 | 0.840              | 3  | 0.214 |
|                         | 4.00 | 0.353 | 3 | 0.822              | 3  | 0.169 |

**S2B****Test of Normality**

|                         |      |       |   | Shapiro-Wilks test | df | SIG   |
|-------------------------|------|-------|---|--------------------|----|-------|
| Kolmogorov-Smirnov test |      |       |   |                    |    |       |
| VAR00002                | 1.00 | 0.206 | 3 | 0.993              | 3  | 0.838 |
|                         | 2.00 | 0.177 | 3 | 1.000              | 3  | 0.966 |
|                         | 3.00 | 0.186 | 3 | 0.998              | 3  | 0.921 |
|                         | 4.00 | 0.261 | 3 | 0.957              | 3  | 0.603 |

**Test of Normality**

|                         |      |       |   | Shapiro-Wilks test | df | SIG   |
|-------------------------|------|-------|---|--------------------|----|-------|
| Kolmogorov-Smirnov test |      |       |   |                    |    |       |
| VAR00002                | 1.00 | 0.199 | 3 | 0.995              | 3  | 0.866 |
|                         | 2.00 | 0.292 | 3 | 0.923              | 3  | 0.464 |
|                         | 3.00 | 0.243 | 3 | 0.972              | 3  | 0.679 |
|                         | 4.00 | 0.233 | 3 | 0.979              | 3  | 0.724 |



**Test of Normality**

|                         |      |       |   |  | Shapiro-Wilks test | df | SIG   |
|-------------------------|------|-------|---|--|--------------------|----|-------|
| Kolmogorov-Smirnov test |      |       |   |  |                    |    |       |
| VAR00002                | 1.00 | 0.352 | 3 |  | 0.826              | 3  | 0.178 |
|                         | 2.00 | 0.207 | 3 |  | 0.992              | 3  | 0.833 |
|                         | 3.00 | 0.255 | 3 |  | 0.962              | 3  | 0.627 |
|                         | 4.00 | 0.262 | 3 |  | 0.956              | 3  | 0.597 |

**S2C**

**Test of Normality**

|                         |      |       |   |       | Shapiro-Wilks test | df | SIG   |
|-------------------------|------|-------|---|-------|--------------------|----|-------|
| Kolmogorov-Smirnov test |      |       |   |       |                    |    |       |
| VAR00002                | 1.00 | 0.182 | 8 | .200* | 0.945              | 8  | 0.657 |
|                         | 2.00 | 0.188 | 8 | .200* | 0.943              | 8  | 0.637 |

**S3B**

**Test of Normality**

|                         |      |       |   |  | Shapiro-Wilks test | df | SIG   |
|-------------------------|------|-------|---|--|--------------------|----|-------|
| Kolmogorov-Smirnov test |      |       |   |  |                    |    |       |
| VAR00002                | 1.00 | 0.361 | 3 |  | 0.807              | 3  | 0.131 |
|                         | 2.00 | 0.194 | 3 |  | 0.997              | 3  | 0.888 |

**S3C**

**Test of Normality**

|                         |      |       |   |  | Shapiro-Wilks test | df | SIG   |
|-------------------------|------|-------|---|--|--------------------|----|-------|
| Kolmogorov-Smirnov test |      |       |   |  |                    |    |       |
| VAR00002                | 1.00 | 0.350 | 3 |  | 0.830              | 3  | 0.189 |
|                         | 2.00 | 0.226 | 3 |  | 0.983              | 3  | 0.751 |

**S3D**

**Test of Normality**

|                         |      |       |   |  | Shapiro-Wilks test | df | SIG   |
|-------------------------|------|-------|---|--|--------------------|----|-------|
| Kolmogorov-Smirnov test |      |       |   |  |                    |    |       |
| VAR00002                | 1.00 | 0.234 | 3 |  | 0.978              | 3  | 0.718 |
|                         | 2.00 | 0.345 | 3 |  | 0.839              | 3  | 0.211 |
|                         | 3.00 | 0.191 | 3 |  | 0.997              | 3  | 0.900 |
|                         | 4.00 | 0.359 | 3 |  | 0.810              | 3  | 0.138 |

**Test of Normality**

|                         |  |  |  |  | Shapiro-Wilks test | df | SIG |
|-------------------------|--|--|--|--|--------------------|----|-----|
| Kolmogorov-Smirnov test |  |  |  |  |                    |    |     |

|          |      |       |   |  |       | df | SIG   |
|----------|------|-------|---|--|-------|----|-------|
| VAR00002 | 1.00 | 0.313 | 3 |  | 0.894 | 3  | 0.366 |
|          | 2.00 | 0.358 | 3 |  | 0.813 | 3  | 0.146 |
|          | 3.00 | 0.278 | 3 |  | 0.940 | 3  | 0.529 |
|          | 4.00 | 0.233 | 3 |  | 0.979 | 3  | 0.721 |

### Test of Normality

|                         |      |       |   |  | Shapiro-<br>Wilks test |    |       |
|-------------------------|------|-------|---|--|------------------------|----|-------|
| Kolmogorov-Smirnov test |      |       |   |  |                        | df | SIG   |
| VAR00002                | 1.00 | 0.296 | 3 |  | 0.918                  | 3  | 0.446 |
|                         | 2.00 | 0.222 | 3 |  | 0.985                  | 3  | 0.769 |
|                         | 3.00 | 0.273 | 3 |  | 0.946                  | 3  | 0.551 |
|                         | 4.00 | 0.211 | 3 |  | 0.991                  | 3  | 0.814 |

S3F

### Test of Normality

|                         |      |       |   |  | Shapiro-<br>Wilks test |    |       |
|-------------------------|------|-------|---|--|------------------------|----|-------|
| Kolmogorov-Smirnov test |      |       |   |  |                        | df | SIG   |
| VAR00002                | 1.00 | 0.331 | 3 |  | 0.865                  | 3  | 0.280 |
|                         | 2.00 | 0.323 | 3 |  | 0.878                  | 3  | 0.319 |
|                         | 3.00 | 0.181 | 3 |  | 0.999                  | 3  | 0.941 |
|                         | 4.00 | 0.182 | 3 |  | 0.999                  | 3  | 0.937 |

### Test of Normality

|                         |      |       |   |  | Shapiro-<br>Wilks test |    |       |
|-------------------------|------|-------|---|--|------------------------|----|-------|
| Kolmogorov-Smirnov test |      |       |   |  |                        | df | SIG   |
| VAR00002                | 1.00 | 0.201 | 3 |  | 0.994                  | 3  | 0.857 |
|                         | 2.00 | 0.311 | 3 |  | 0.897                  | 3  | 0.375 |
|                         | 3.00 | 0.194 | 3 |  | 0.996                  | 3  | 0.886 |
|                         | 4.00 | 0.226 | 3 |  | 0.983                  | 3  | 0.751 |

S3G

### Test of Normality

|                         |      |       |   |  | Shapiro-<br>Wilks test |    |       |
|-------------------------|------|-------|---|--|------------------------|----|-------|
| Kolmogorov-Smirnov test |      |       |   |  |                        | df | SIG   |
| VAR00002                | 1.00 | 0.200 | 3 |  | 0.995                  | 3  | 0.863 |
|                         | 2.00 | 0.189 | 3 |  | 0.998                  | 3  | 0.908 |
|                         | 3.00 | 0.225 | 3 |  | 0.984                  | 3  | 0.758 |
|                         | 4.00 | 0.302 | 3 |  | 0.910                  | 3  | 0.418 |
|                         | 5.00 | 0.297 | 3 |  | 0.917                  | 3  | 0.441 |
|                         | 6.00 | 0.200 | 3 |  | 0.995                  | 3  | 0.862 |

**Test of Normality**

| Kolmogorov-Smirnov test |      |       |   |  | Shapiro-Wilks test | df | SIG   |
|-------------------------|------|-------|---|--|--------------------|----|-------|
| VAR00002                | 1.00 | 0.345 | 3 |  | 0.839              | 3  | 0.211 |
|                         | 2.00 | 0.286 | 3 |  | 0.930              | 3  | 0.490 |
|                         | 3.00 | 0.312 | 3 |  | 0.895              | 3  | 0.371 |
|                         | 4.00 | 0.365 | 3 |  | 0.797              | 3  | 0.108 |
|                         | 5.00 | 0.344 | 3 |  | 0.841              | 3  | 0.217 |
|                         | 6.00 | 0.357 | 3 |  | 0.815              | 3  | 0.151 |

**Test of Normality**

| Kolmogorov-Smirnov test |      |       |   |  | Shapiro-Wilks test | df | SIG   |
|-------------------------|------|-------|---|--|--------------------|----|-------|
| VAR00002                | 1.00 | 0.369 | 3 |  | 0.787              | 3  | 0.085 |
|                         | 2.00 | 0.219 | 3 |  | 0.987              | 3  | 0.783 |
|                         | 3.00 | 0.320 | 3 |  | 0.884              | 3  | 0.335 |
|                         | 4.00 | 0.359 | 3 |  | 0.810              | 3  | 0.138 |
|                         | 5.00 | 0.325 | 3 |  | 0.874              | 3  | 0.308 |
|                         | 6.00 | 0.365 | 3 |  | 0.797              | 3  | 0.108 |

**S3H**

**Test of Normality**

| Kolmogorov-Smirnov test |      |       |   |       | Shapiro-Wilks test | df | SIG   |
|-------------------------|------|-------|---|-------|--------------------|----|-------|
| VAR00002                | 1.00 | 0.140 | 8 | .200* | 0.988              | 8  | 0.992 |
|                         | 2.00 | 0.158 | 8 | .200* | 0.967              | 8  | 0.871 |
|                         | 3.00 | 0.139 | 8 | .200* | 0.939              | 8  | 0.605 |
|                         | 4.00 | 0.186 | 8 | .200* | 0.937              | 8  | 0.583 |

**S4B**

**Test of Normality**

| Kolmogorov-Smirnov test |      |       |   |  | Shapiro-Wilks test | df | SIG   |
|-------------------------|------|-------|---|--|--------------------|----|-------|
| VAR00002                | 1.00 | 0.363 | 3 |  | 0.801              | 3  | 0.118 |
|                         | 2.00 | 0.348 | 3 |  | 0.834              | 3  | 0.199 |

**Test of Normality**

| Kolmogorov-Smirnov test |  |  |  |  | Shapiro-Wilks test | df | SIG |
|-------------------------|--|--|--|--|--------------------|----|-----|
|                         |  |  |  |  |                    |    |     |

|          |      |       |   |  |       | df | SIG   |
|----------|------|-------|---|--|-------|----|-------|
| VAR00002 | 1.00 | 0.260 | 3 |  | 0.958 | 3  | 0.605 |
|          | 2.00 | 0.342 | 3 |  | 0.846 | 3  | 0.229 |

**S4C**

**Test of Normality**

|                         |      |       |   |  | Shapiro-<br>Wilks test |    |       |
|-------------------------|------|-------|---|--|------------------------|----|-------|
| Kolmogorov-Smirnov test |      |       |   |  |                        | df | SIG   |
| VAR00002                | 1.00 | 0.296 | 3 |  | 0.918                  | 3  | 0.444 |
|                         | 2.00 | 0.319 | 3 |  | 0.885                  | 3  | 0.339 |

**S4D**

**Test of Normality**

|                         |      |       |   |  | Shapiro-<br>Wilks test |    |       |
|-------------------------|------|-------|---|--|------------------------|----|-------|
| Kolmogorov-Smirnov test |      |       |   |  |                        | df | SIG   |
| VAR00002                | 1.00 | 0.330 | 3 |  | 0.867                  | 3  | 0.287 |
|                         | 2.00 | 0.254 | 3 |  | 0.963                  | 3  | 0.632 |

**S4E**

**Test of Normality**

|                         |      |       |   |  | Shapiro-<br>Wilks test |    |       |
|-------------------------|------|-------|---|--|------------------------|----|-------|
| Kolmogorov-Smirnov test |      |       |   |  |                        | df | SIG   |
| VAR00002                | 1.00 | 0.289 | 3 |  | 0.927                  | 3  | 0.479 |
|                         | 2.00 | 0.192 | 3 |  | 0.997                  | 3  | 0.897 |
|                         | 3.00 | 0.336 | 3 |  | 0.855                  | 3  | 0.255 |
|                         | 4.00 | 0.353 | 3 |  | 0.823                  | 3  | 0.171 |

**Test of Normality**

|                         |      |       |   |  | Shapiro-<br>Wilks test |    |       |
|-------------------------|------|-------|---|--|------------------------|----|-------|
| Kolmogorov-Smirnov test |      |       |   |  |                        | df | SIG   |
| VAR00002                | 1.00 | 0.208 | 3 |  | 0.992                  | 3  | 0.828 |
|                         | 2.00 | 0.302 | 3 |  | 0.910                  | 3  | 0.419 |
|                         | 3.00 | 0.237 | 3 |  | 0.976                  | 3  | 0.704 |
|                         | 4.00 | 0.205 | 3 |  | 0.993                  | 3  | 0.839 |

**Test of Normality**

|                         |      |       |   |  | Shapiro-<br>Wilks test |    |       |
|-------------------------|------|-------|---|--|------------------------|----|-------|
| Kolmogorov-Smirnov test |      |       |   |  |                        | df | SIG   |
| VAR00002                | 1.00 | 0.229 | 3 |  | 0.981                  | 3  | 0.738 |
|                         | 2.00 | 0.266 | 3 |  | 0.952                  | 3  | 0.579 |
|                         | 3.00 | 0.197 | 3 |  | 0.996                  | 3  | 0.874 |
|                         | 4.00 | 0.370 | 3 |  | 0.786                  | 3  | 0.082 |

**Test of Normality**

|                         |      |       |   | Shapiro-Wilks test | df | SIG   |
|-------------------------|------|-------|---|--------------------|----|-------|
| Kolmogorov-Smirnov test |      |       |   |                    |    |       |
| VAR00002                | 1.00 | 0.187 | 3 | 0.998              | 3  | 0.916 |
|                         | 2.00 | 0.188 | 3 | 0.998              | 3  | 0.911 |
|                         | 3.00 | 0.308 | 3 | 0.902              | 3  | 0.392 |
|                         | 4.00 | 0.197 | 3 | 0.996              | 3  | 0.874 |

**S4G**

**Test of Normality**

|                         |      |       |   | Shapiro-Wilks test | df | SIG   |
|-------------------------|------|-------|---|--------------------|----|-------|
| Kolmogorov-Smirnov test |      |       |   |                    |    |       |
| VAR00002                | 1.00 | 0.358 | 3 | 0.812              | 3  | 0.144 |
|                         | 2.00 | 0.290 | 3 | 0.926              | 3  | 0.476 |
|                         | 3.00 | 0.299 | 3 | 0.914              | 3  | 0.432 |
|                         | 4.00 | 0.233 | 3 | 0.979              | 3  | 0.724 |

**Test of Normality**

|                         |      |       |   | Shapiro-Wilks test | df | SIG   |
|-------------------------|------|-------|---|--------------------|----|-------|
| Kolmogorov-Smirnov test |      |       |   |                    |    |       |
| VAR00002                | 1.00 | 0.353 | 3 | 0.823              | 3  | 0.170 |
|                         | 2.00 | 0.318 | 3 | 0.886              | 3  | 0.342 |
|                         | 3.00 | 0.312 | 3 | 0.896              | 3  | 0.374 |
|                         | 4.00 |       | 3 | 0.912              | 3  | 0.425 |

**Test of Normality**

|                         |      |       |   | Shapiro-Wilks test | df | SIG   |
|-------------------------|------|-------|---|--------------------|----|-------|
| Kolmogorov-Smirnov test |      |       |   |                    |    |       |
| VAR00002                | 1.00 | 0.269 | 3 | 0.950              | 3  | 0.568 |
|                         | 2.00 | 0.297 | 3 | 0.917              | 3  | 0.442 |
|                         | 3.00 | 0.276 | 3 | 0.942              | 3  | 0.536 |
|                         | 4.00 | 0.271 | 3 | 0.947              | 3  | 0.558 |

**S4I**

**Test of Normality**

|                         |      |       |   | Shapiro-Wilks test | df | SIG   |
|-------------------------|------|-------|---|--------------------|----|-------|
| Kolmogorov-Smirnov test |      |       |   |                    |    |       |
| VAR00002                | 1.00 | 0.314 | 3 | 0.893              | 3  | 0.365 |
|                         | 2.00 | 0.198 | 3 | 0.995              | 3  | 0.869 |
|                         | 3.00 | 0.350 | 3 | 0.830              | 3  | 0.188 |
|                         | 4.00 | 0.366 | 3 | 0.796              | 3  | 0.105 |

**Test of Normality**

|                         |      |       |   |  | Shapiro-Wilks test | df | SIG   |
|-------------------------|------|-------|---|--|--------------------|----|-------|
| Kolmogorov-Smirnov test |      |       |   |  |                    |    |       |
| VAR00002                | 1.00 | 0.224 | 3 |  | 0.984              | 3  | 0.760 |
|                         | 2.00 | 0.237 | 3 |  | 0.977              | 3  | 0.707 |
|                         | 3.00 | 0.365 | 3 |  | 0.797              | 3  | 0.108 |
|                         | 4.00 | 0.312 | 3 |  | 0.895              | 3  | 0.371 |

**Test of Normality**

|                         |      |       |   |  | Shapiro-Wilks test | df | SIG   |
|-------------------------|------|-------|---|--|--------------------|----|-------|
| Kolmogorov-Smirnov test |      |       |   |  |                    |    |       |
| VAR00002                | 1.00 | 0.359 | 3 |  | 0.810              | 3  | 0.139 |
|                         | 2.00 | 0.223 | 3 |  | 0.985              | 3  | 0.764 |
|                         | 3.00 | 0.178 | 3 |  | 0.999              | 3  | 0.954 |
|                         | 4.00 | 0.211 | 3 |  | 0.991              | 3  | 0.817 |

**S4G**

**Test of Normality**

|                         |      |       |   |       | Shapiro-Wilks test | df | SIG   |
|-------------------------|------|-------|---|-------|--------------------|----|-------|
| Kolmogorov-Smirnov test |      |       |   |       |                    |    |       |
| VAR00002                | 1.00 | 0.189 | 8 | .200* | 0.908              | 8  | 0.340 |
|                         | 2.00 | 0.154 | 8 | .200* | 0.943              | 8  | 0.641 |
|                         | 3.00 | 0.212 | 7 | .200* | 0.923              | 7  | 0.494 |
|                         | 4.00 | 0.184 | 9 | .200* | 0.921              | 9  | 0.398 |

**S5A**

**Test of Normality**

|                         |      |       |   |       | Shapiro-Wilks test | df | SIG   |
|-------------------------|------|-------|---|-------|--------------------|----|-------|
| Kolmogorov-Smirnov test |      |       |   |       |                    |    |       |
| VAR00002                | 1.00 | 0.203 | 5 | .200* | 0.929              | 5  | 0.590 |
|                         | 2.00 | 0.250 | 5 | .200* | 0.935              | 5  | 0.631 |
|                         | 3.00 | 0.278 | 5 | .200* | 0.857              | 5  | 0.216 |
|                         | 4.00 | 0.212 | 5 | .200* | 0.911              | 5  | 0.476 |
|                         | 5.00 | 0.288 | 5 | .200* | 0.885              | 5  | 0.331 |
|                         | 6.00 | 0.317 | 5 | 0.112 | 0.823              | 5  | 0.124 |

**S5C**

**Test of Normality**

|                         |  |  |  |  | Shapiro-Wilks test | df | SIG |
|-------------------------|--|--|--|--|--------------------|----|-----|
| Kolmogorov-Smirnov test |  |  |  |  |                    |    |     |

|          |      |       |   |       |       |   |       |
|----------|------|-------|---|-------|-------|---|-------|
| VAR00002 | 1.00 | 0.231 | 5 | .200* | 0.960 | 5 | 0.807 |
|          | 2.00 | 0.222 | 5 | .200* | 0.899 | 5 | 0.404 |
|          | 3.00 | 0.283 | 5 | .200* | 0.865 | 5 | 0.247 |
|          | 4.00 | 0.207 | 5 | .200* | 0.967 | 5 | 0.858 |

### Test of Normality

| Kolmogorov-Smirnov test |      |       |   |       | Shapiro-Wilks test | df | SIG   |
|-------------------------|------|-------|---|-------|--------------------|----|-------|
| VAR00002                | 1.00 | 0.264 | 5 | .200* | 0.857              | 5  | 0.218 |
|                         | 2.00 | 0.207 | 5 | .200* | 0.940              | 5  | 0.669 |
|                         | 3.00 | 0.205 | 5 | .200* | 0.939              | 5  | 0.661 |
|                         | 4.00 | 0.204 | 5 | .200* | 0.946              | 5  | 0.705 |

### Test of Normality

| Kolmogorov-Smirnov test |      |       |   |       | Shapiro-Wilks test | df | SIG   |
|-------------------------|------|-------|---|-------|--------------------|----|-------|
| VAR00002                | 1.00 | 0.210 | 5 | .200* | 0.927              | 5  | 0.579 |
|                         | 2.00 | 0.252 | 4 |       | 0.894              | 4  | 0.403 |
|                         | 3.00 | 0.213 | 5 | .200* | 0.926              | 5  | 0.569 |
|                         | 4.00 | 0.289 | 5 | .200* | 0.784              | 5  | 0.059 |

## S5D

### Test of Normality

| Kolmogorov-Smirnov test |      |       |    |       | Shapiro-Wilks test | df | SIG   |
|-------------------------|------|-------|----|-------|--------------------|----|-------|
| VAR00002                | 1.00 | 0.123 | 9  | .200* | 0.960              | 9  | 0.793 |
|                         | 2.00 | 0.167 | 9  | .200* | 0.946              | 9  | 0.650 |
|                         | 3.00 | 0.250 | 8  | 0.151 | 0.862              | 8  | 0.125 |
|                         | 4.00 | 0.110 | 10 | .200* | 0.972              | 10 | 0.910 |

## S5E

### Test of Normality

| Kolmogorov-Smirnov test |      |       |   |  | Shapiro-Wilks test | df | SIG   |
|-------------------------|------|-------|---|--|--------------------|----|-------|
| VAR00002                | 1.00 | 0.228 | 3 |  | 0.982              | 3  | 0.745 |
|                         | 2.00 | 0.370 | 3 |  | 0.785              | 3  | 0.079 |
|                         | 3.00 | 0.204 | 3 |  | 0.993              | 3  | 0.844 |
|                         | 4.00 | 0.328 | 3 |  | 0.870              | 3  | 0.294 |

### Test of Normality

| Kolmogorov-Smirnov test |  |  |  |  | Shapiro-Wilks test | df | SIG |
|-------------------------|--|--|--|--|--------------------|----|-----|
|                         |  |  |  |  |                    |    |     |

|          |      |       |   |  |       | df | SIG   |
|----------|------|-------|---|--|-------|----|-------|
| VAR00002 | 1.00 | 0.195 | 3 |  | 0.996 | 3  | 0.881 |
|          | 2.00 | 0.343 | 3 |  | 0.844 | 3  | 0.224 |
|          | 3.00 | 0.362 | 3 |  | 0.805 | 3  | 0.126 |
|          | 4.00 | 0.205 | 3 |  | 0.993 | 3  | 0.839 |

### Test of Normality

|                         |      |       |   |  | Shapiro-<br>Wilks test |    |       |
|-------------------------|------|-------|---|--|------------------------|----|-------|
| Kolmogorov-Smirnov test |      |       |   |  |                        | df | SIG   |
| VAR00002                | 1.00 | 0.346 | 3 |  | 0.837                  | 3  | 0.205 |
|                         | 2.00 | 0.327 | 3 |  | 0.871                  | 3  | 0.298 |
|                         | 3.00 | 0.312 | 3 |  | 0.895                  | 3  | 0.371 |
|                         | 4.00 | 0.346 | 3 |  | 0.837                  | 3  | 0.205 |

S5F

### Test of Normality

|                         |      |       |   |  | Shapiro-<br>Wilks test |    |       |
|-------------------------|------|-------|---|--|------------------------|----|-------|
| Kolmogorov-Smirnov test |      |       |   |  |                        | df | SIG   |
| VAR00002                | 1.00 | 0.260 | 3 |  | 0.958                  | 3  | 0.608 |
|                         | 2.00 | 0.269 | 3 |  | 0.950                  | 3  | 0.568 |
|                         | 3.00 | 0.274 | 3 |  | 0.945                  | 3  | 0.547 |
|                         | 4.00 | 0.296 | 3 |  | 0.919                  | 3  | 0.448 |

### Test of Normality

|                         |      |       |   |  | Shapiro-<br>Wilks test |    |       |
|-------------------------|------|-------|---|--|------------------------|----|-------|
| Kolmogorov-Smirnov test |      |       |   |  |                        | df | SIG   |
| VAR00002                | 1.00 | 0.372 | 3 |  | 0.780                  | 3  | 0.068 |
|                         | 2.00 | 0.322 | 3 |  | 0.880                  | 3  | 0.324 |
|                         | 3.00 | 0.341 | 3 |  | 0.847                  | 3  | 0.233 |
|                         | 4.00 | 0.221 | 3 |  | 0.986                  | 3  | 0.775 |

### Test of Normality

|                         |      |       |   |  | Shapiro-<br>Wilks test |    |       |
|-------------------------|------|-------|---|--|------------------------|----|-------|
| Kolmogorov-Smirnov test |      |       |   |  |                        | df | SIG   |
| VAR00002                | 1.00 | 0.278 | 3 |  | 0.940                  | 3  | 0.529 |
|                         | 2.00 | 0.280 | 3 |  | 0.937                  | 3  | 0.517 |
|                         | 3.00 | 0.304 | 3 |  | 0.907                  | 3  | 0.408 |
|                         | 4.00 | 0.278 | 3 |  | 0.940                  | 3  | 0.526 |

S5G

### Test of Normality



| Kolmogorov-Smirnov test |      |       |   |       | Shapiro-Wilks test | df | SIG   |
|-------------------------|------|-------|---|-------|--------------------|----|-------|
| VAR00002                | 1.00 | 0.202 | 8 | .200* | 0.926              | 8  | 0.483 |
|                         | 2.00 | 0.240 | 7 | .200* | 0.846              | 7  | 0.112 |
|                         | 3.00 | 0.217 | 8 | .200* | 0.887              | 8  | 0.218 |
|                         | 4.00 | 0.157 | 8 | .200* | 0.977              | 8  | 0.944 |

**S6A**

**Test of Normality**

| Kolmogorov-Smirnov test |      |       |   |  | Shapiro-Wilks test | df | SIG   |
|-------------------------|------|-------|---|--|--------------------|----|-------|
| VAR00002                | 1.00 | 0.320 | 3 |  | 0.883              | 3  | 0.334 |
|                         | 2.00 | 0.198 | 3 |  | 0.995              | 3  | 0.869 |
|                         | 3.00 | 0.308 | 3 |  | 0.902              | 3  | 0.391 |
|                         | 4.00 | 0.343 | 3 |  | 0.843              | 3  | 0.223 |

**Test of Normality**

| Kolmogorov-Smirnov test |      |       |   |       | Shapiro-Wilks test | df | SIG   |
|-------------------------|------|-------|---|-------|--------------------|----|-------|
| VAR00002                | 1.00 | 0.245 | 5 | .200* | 0.944              | 5  | 0.692 |
|                         | 2.00 | 0.204 | 5 | .200* | 0.939              | 5  | 0.659 |
|                         | 3.00 | 0.183 | 5 | .200* | 0.905              | 5  | 0.436 |
|                         | 4.00 | 0.257 | 5 | .200* | 0.857              | 5  | 0.218 |

**S6B**

**Test of Normality**

| Kolmogorov-Smirnov test |      |       |   |  | Shapiro-Wilks test | df | SIG   |
|-------------------------|------|-------|---|--|--------------------|----|-------|
| VAR00002                | 1.00 | 0.363 | 3 |  | 0.802              | 3  | 0.118 |
|                         | 2.00 | 0.286 | 3 |  | 0.931              | 3  | 0.492 |
|                         | 3.00 | 0.338 | 3 |  | 0.852              | 3  | 0.247 |
|                         | 4.00 | 0.362 | 3 |  | 0.805              | 3  | 0.126 |
|                         | 5.00 | 0.358 | 3 |  | 0.814              | 3  | 0.147 |
|                         | 6.00 | 0.260 | 3 |  | 0.958              | 3  | 0.608 |

**Test of Normality**

| 分组       | Kolmogorov-Smirnov test |       |   |       | Shapiro-Wilks test | df | SIG   |
|----------|-------------------------|-------|---|-------|--------------------|----|-------|
| VAR00002 | 1.00                    | 0.246 | 5 | .200* | 0.918              | 5  | 0.516 |
|          | 2.00                    | 0.207 | 5 | .200* | 0.939              | 5  | 0.658 |
|          | 3.00                    | 0.251 | 5 | .200* | 0.927              | 5  | 0.578 |
|          | 4.00                    | 0.338 | 5 | 0.064 | 0.776              | 5  | 0.051 |

|      |       |   |       |       |   |       |
|------|-------|---|-------|-------|---|-------|
| 5.00 | 0.277 | 5 | .200* | 0.884 | 5 | 0.329 |
| 6.00 | 0.202 | 5 | .200* | 0.932 | 5 | 0.610 |

**S6C**

**Test of Normality**

| Kolmogorov-Smirnov test |      |       |   | Shapiro-Wilks test | df | SIG   |
|-------------------------|------|-------|---|--------------------|----|-------|
| VAR00002                | 1.00 | 0.229 | 3 | 0.982              | 3  | 0.740 |
|                         | 2.00 | 0.312 | 3 | 0.896              | 3  | 0.373 |
|                         | 3.00 | 0.192 | 3 | 0.997              | 3  | 0.895 |
|                         | 4.00 | 0.258 | 3 | 0.960              | 3  | 0.617 |

**Test of Normality**

| Kolmogorov-Smirnov test |      |       |   | Shapiro-Wilks test | df    | SIG |       |
|-------------------------|------|-------|---|--------------------|-------|-----|-------|
| VAR00002                | 1.00 | 0.243 | 5 | .200*              | 0.929 | 5   | 0.589 |
|                         | 2.00 | 0.206 | 5 | .200*              | 0.939 | 5   | 0.661 |
|                         | 3.00 | 0.198 | 5 | .200*              | 0.953 | 5   | 0.762 |
|                         | 4.00 | 0.255 | 5 | .200*              | 0.909 | 5   | 0.460 |

**S7A**

**Test of Normality**

| Kolmogorov-Smirnov test |      |       |   | Shapiro-Wilks test | df | SIG   |
|-------------------------|------|-------|---|--------------------|----|-------|
| VAR00002                | 1.00 | 0.184 | 3 | 0.999              | 3  | 0.927 |
|                         | 2.00 | 0.374 | 3 | 0.777              | 3  | 0.060 |

**Test of Normality**

| Kolmogorov-Smirnov test |      |       |   | Shapiro-Wilks test | df | SIG   |
|-------------------------|------|-------|---|--------------------|----|-------|
| VAR00002                | 1.00 | 0.364 | 3 | 0.800              | 3  | 0.115 |
|                         | 2.00 | 0.347 | 3 | 0.835              | 3  | 0.202 |

**Test of Normality**

| Kolmogorov-Smirnov test |      |       |   | Shapiro-Wilks test | df | SIG   |
|-------------------------|------|-------|---|--------------------|----|-------|
| VAR00002                | 1.00 | 0.229 | 3 | 0.982              | 3  | 0.740 |
|                         | 2.00 | 0.342 | 3 | 0.844              | 3  | 0.225 |

### Test of Normality

|          | Kolmogorov-Smirnov test |       |   | Shapiro-Wilks test | df | SIG   |
|----------|-------------------------|-------|---|--------------------|----|-------|
|          |                         |       |   |                    |    |       |
| VAR00002 | 1.00                    | 0.317 | 3 | 0.888              | 3  | 0.349 |
|          | 2.00                    | 0.185 | 3 | 0.998              | 3  | 0.925 |

### Test of Normality

|          | Kolmogorov-Smirnov test |       |   | Shapiro-Wilks test | df | SIG   |
|----------|-------------------------|-------|---|--------------------|----|-------|
|          |                         |       |   |                    |    |       |
| VAR00002 | 1.00                    | 0.298 | 3 | 0.916              | 3  | 0.438 |
|          | 2.00                    | 0.232 | 3 | 0.980              | 3  | 0.727 |
